# Supplementary material
Source: PubMed Central journal article supplement (PMC2755906)
Supplement: supp_M109.018275_suppl.pdf [file supp_M109.018275_suppl.pdf]

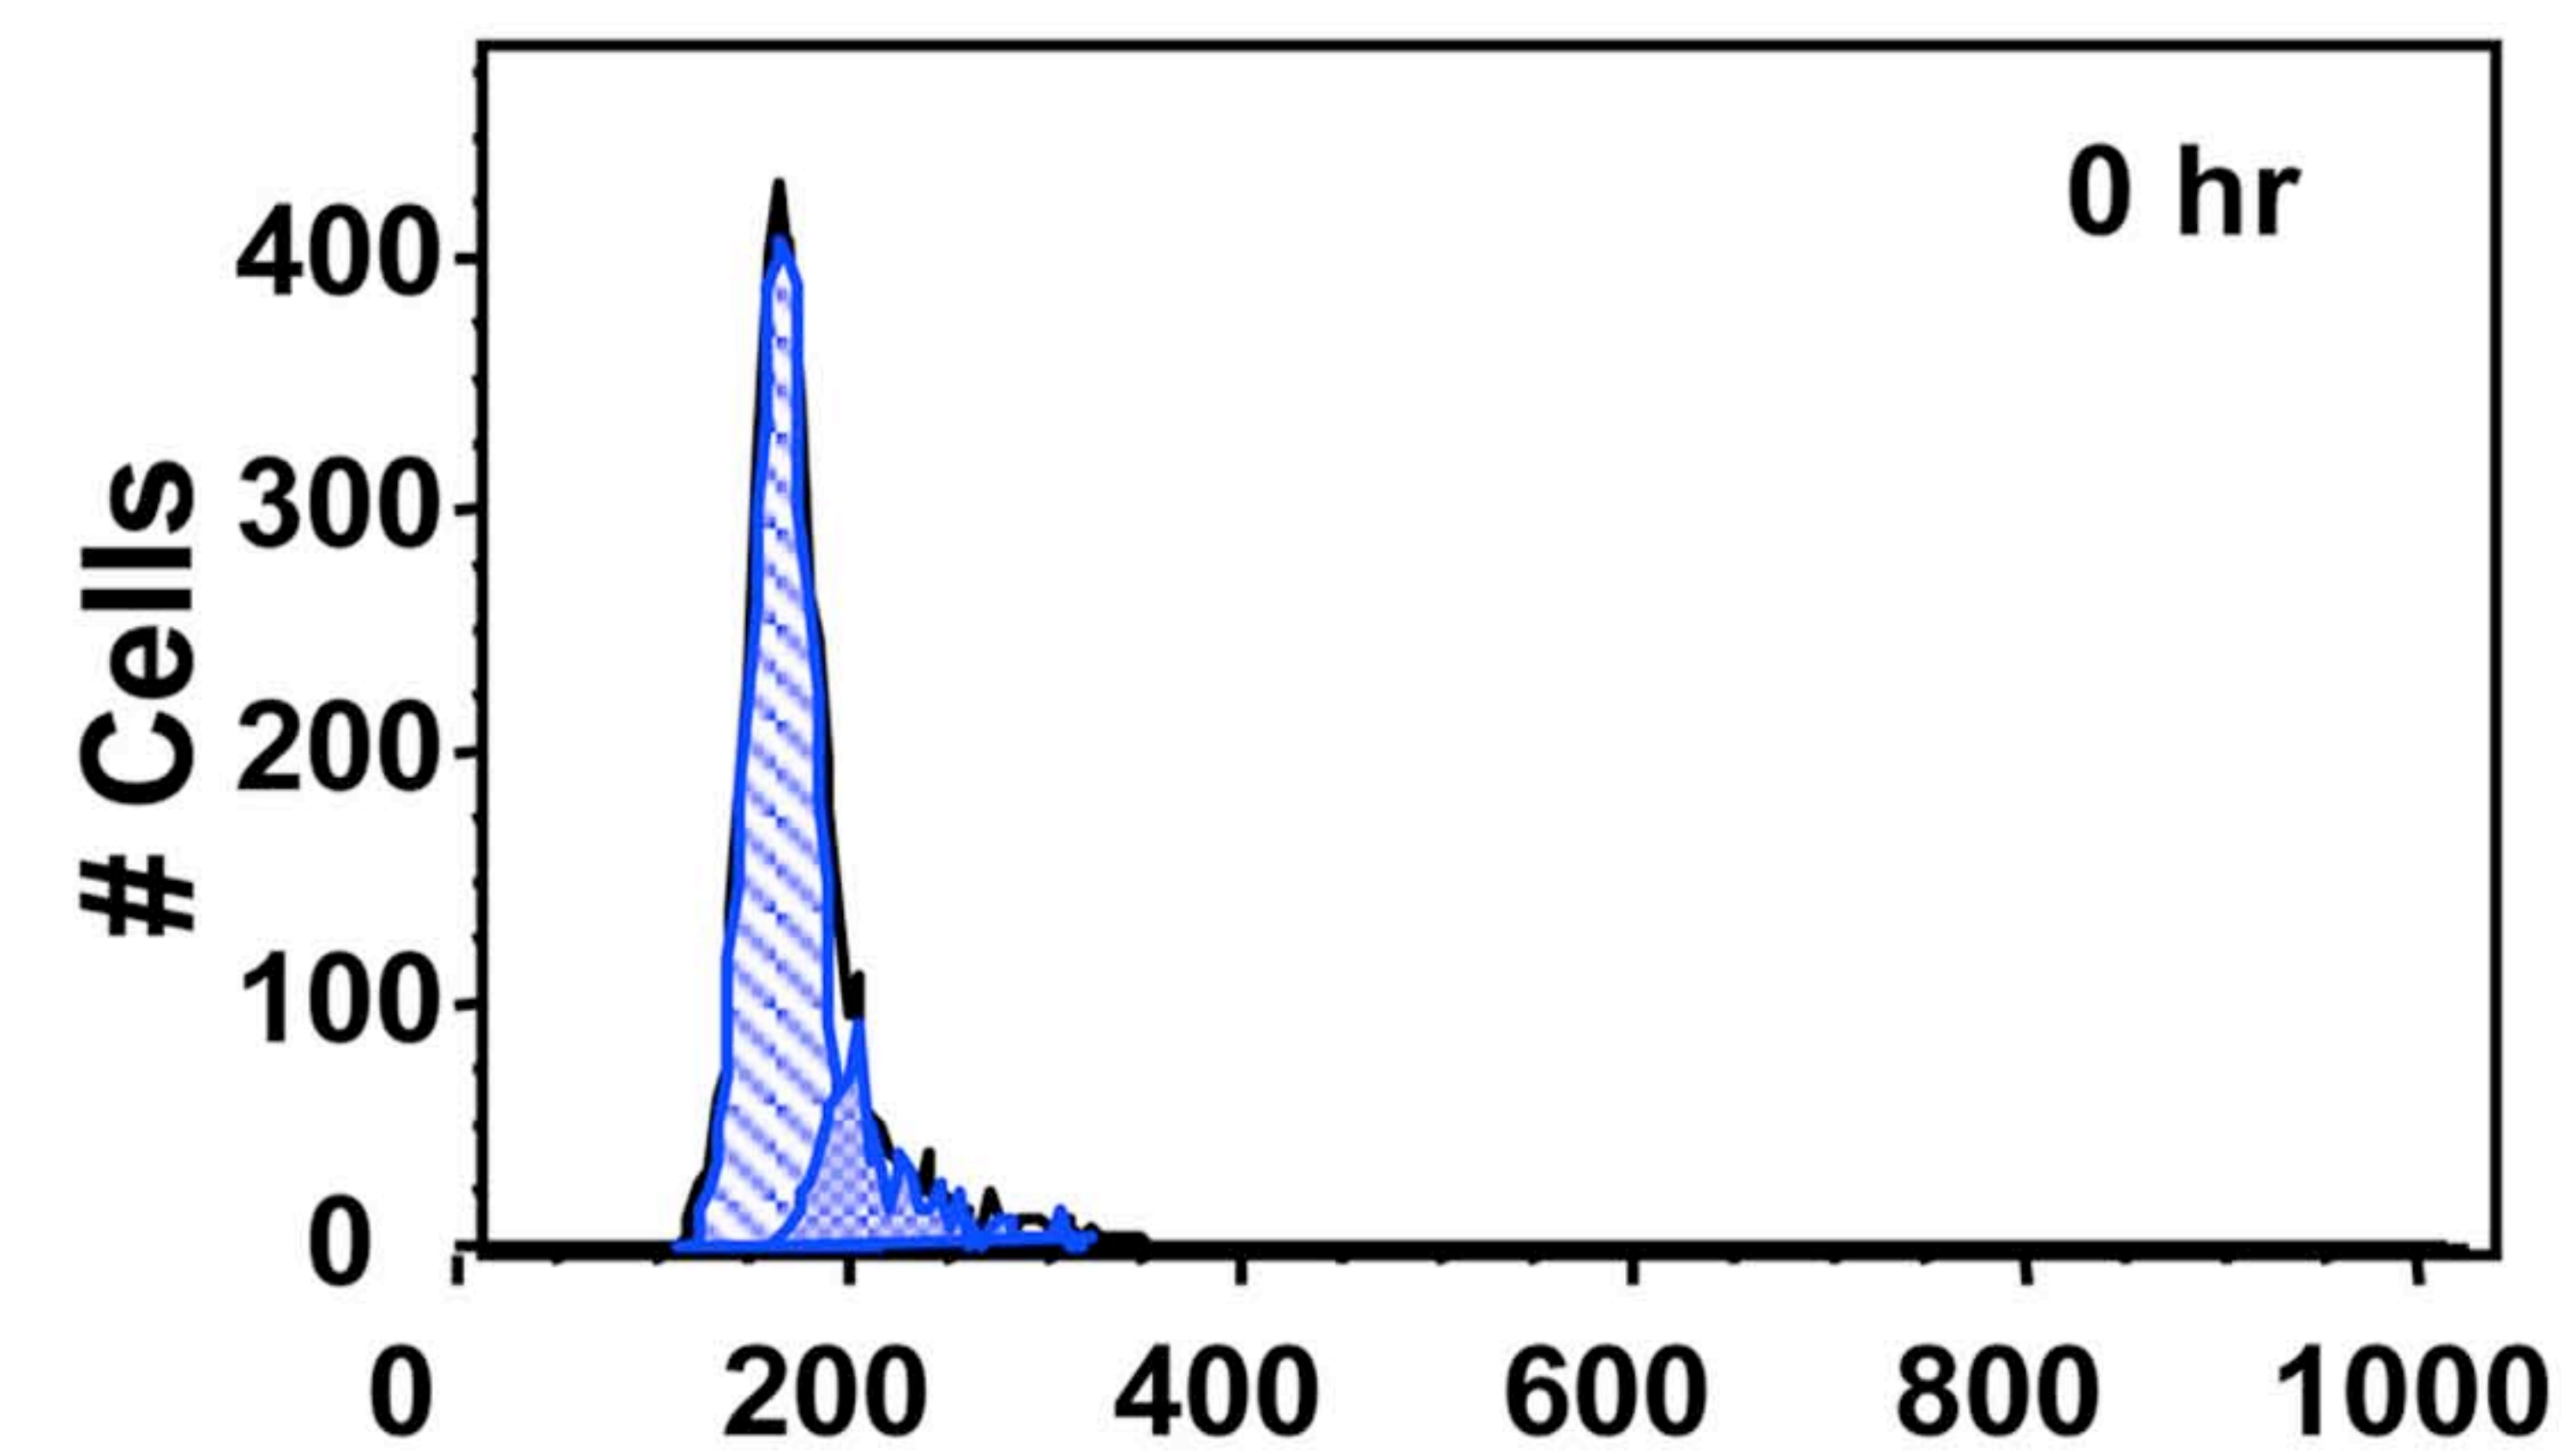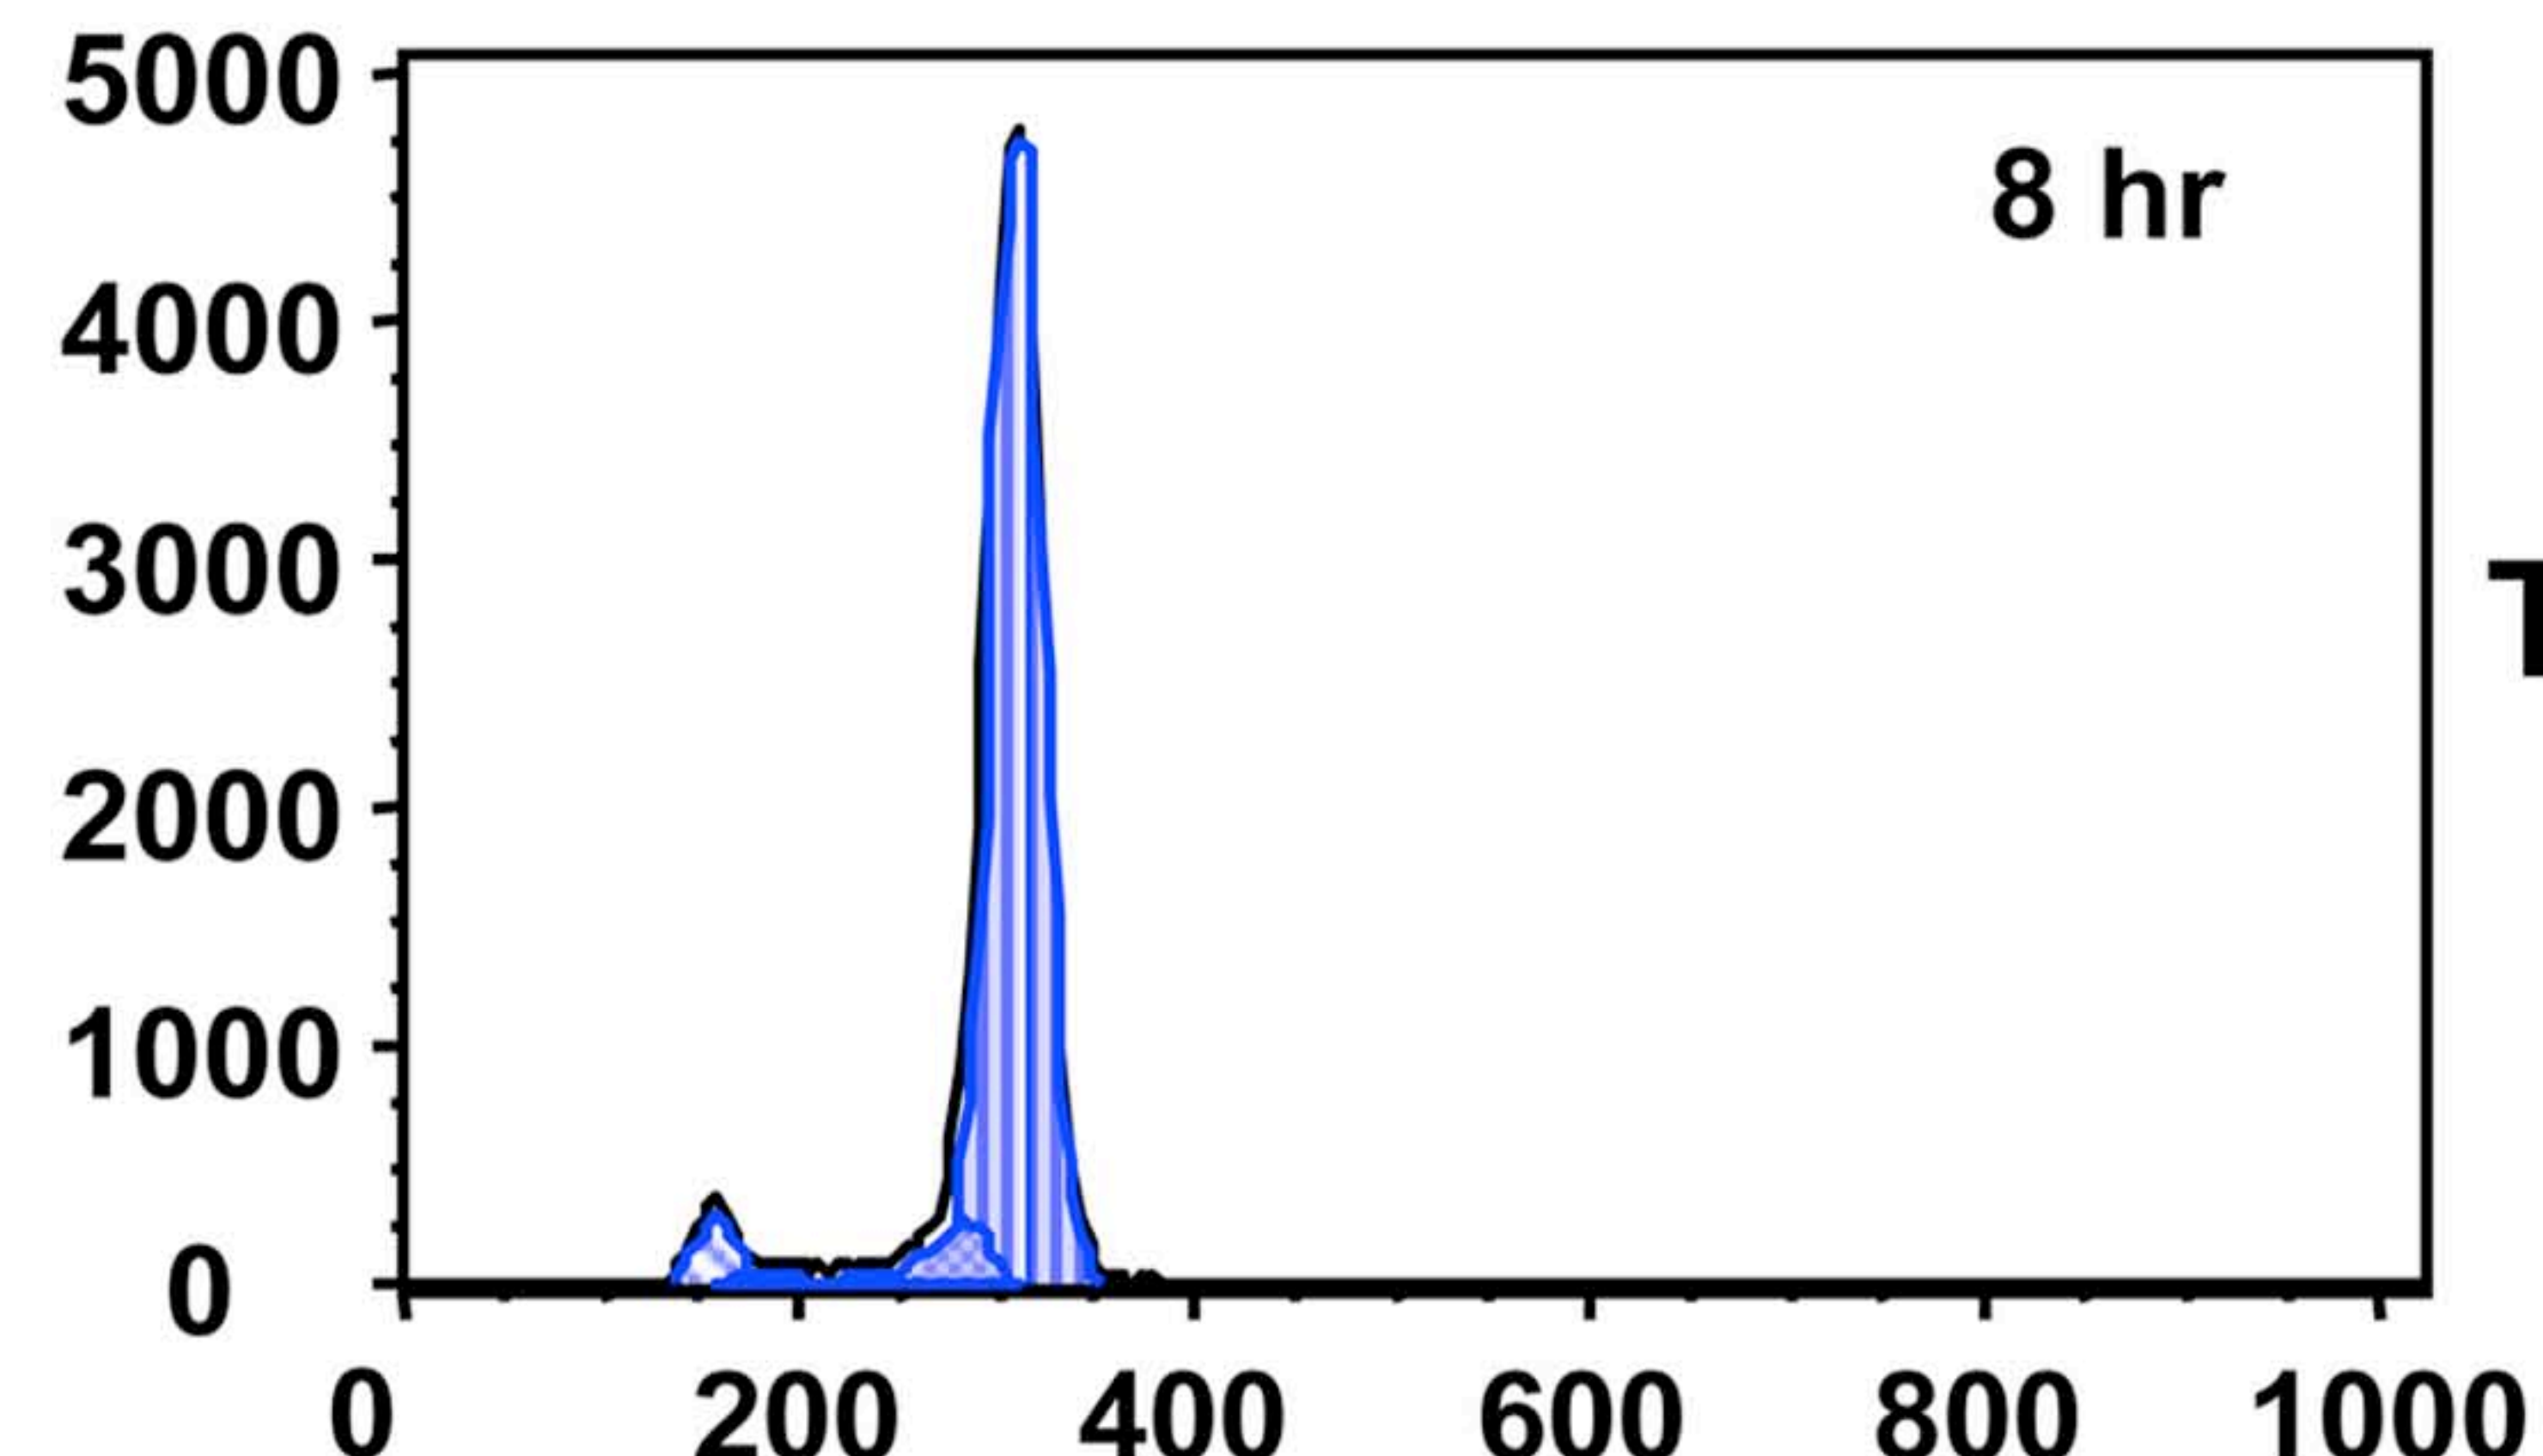

Time (hr) : 0 2 4 6 8 10 12 14

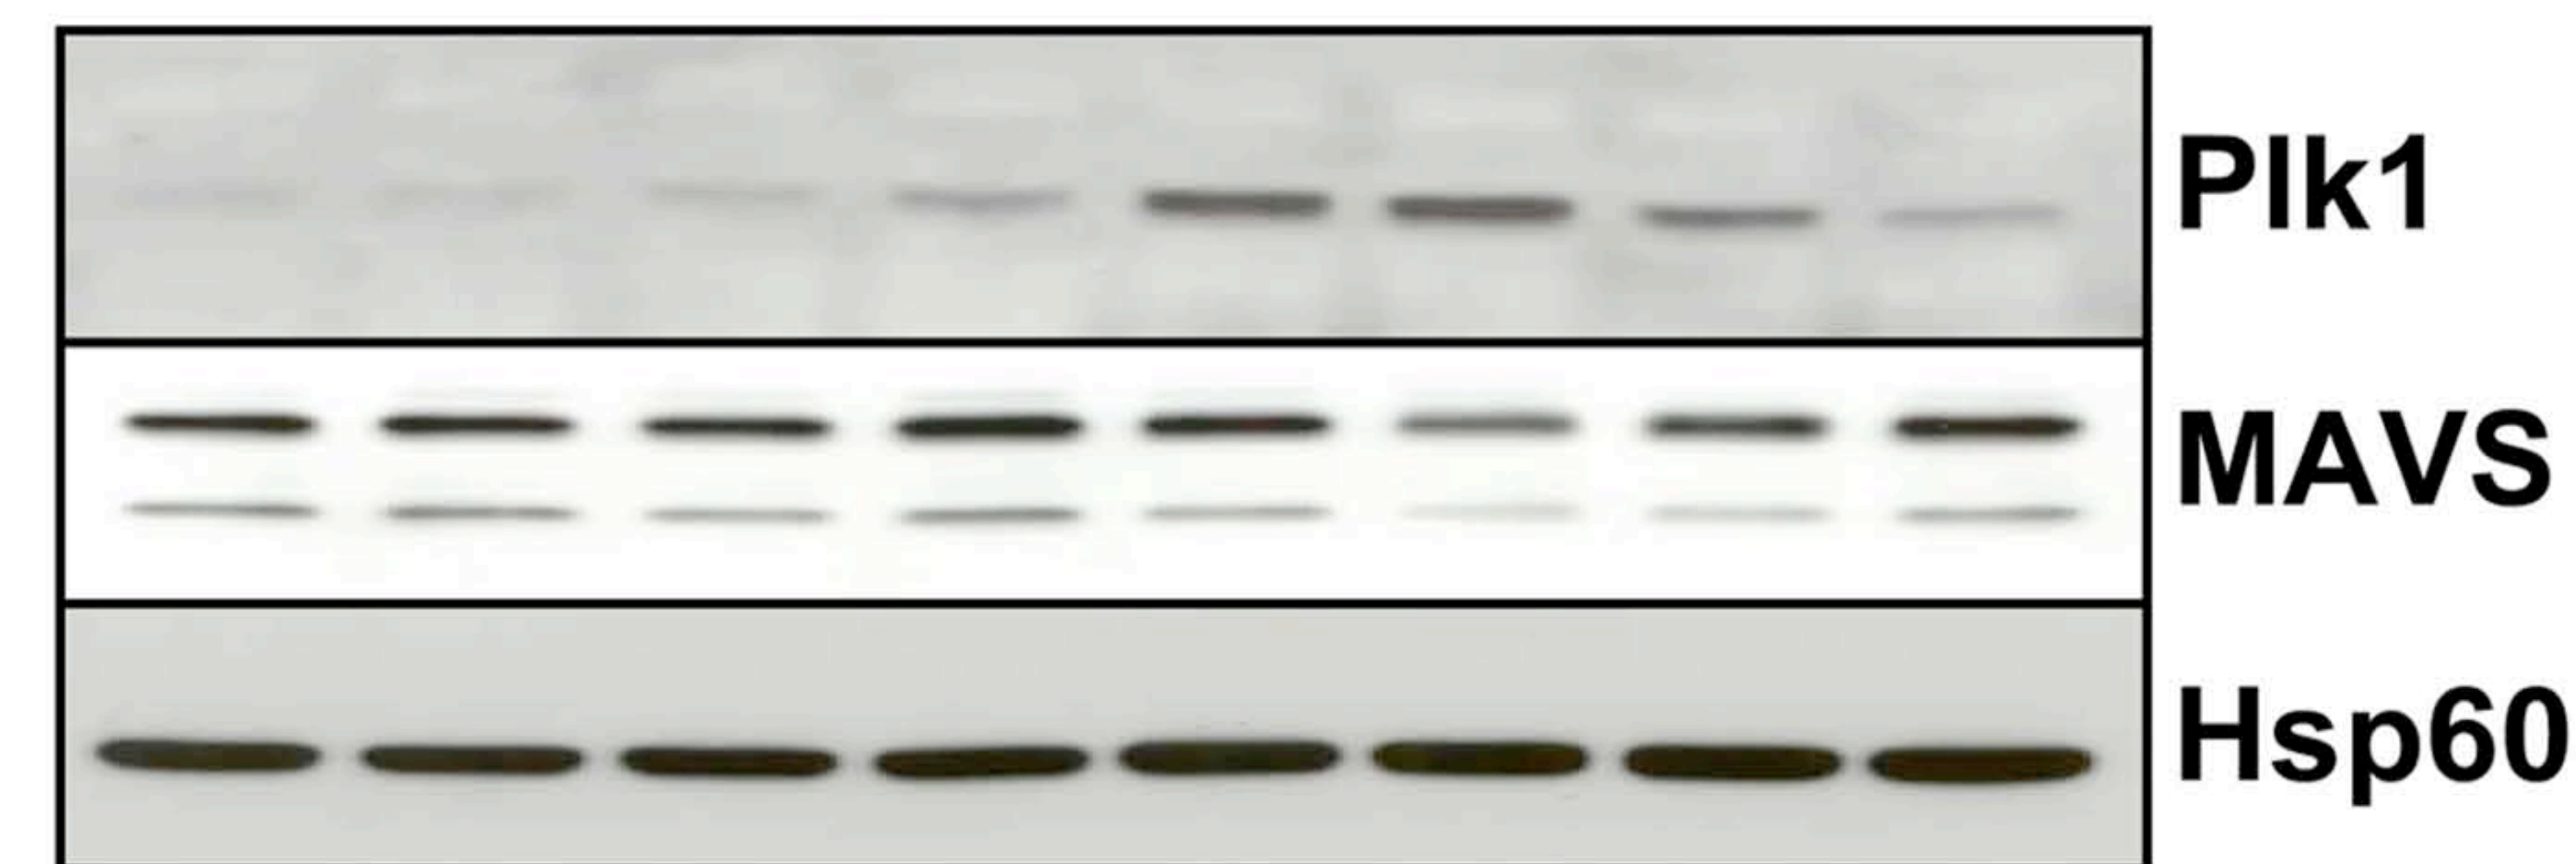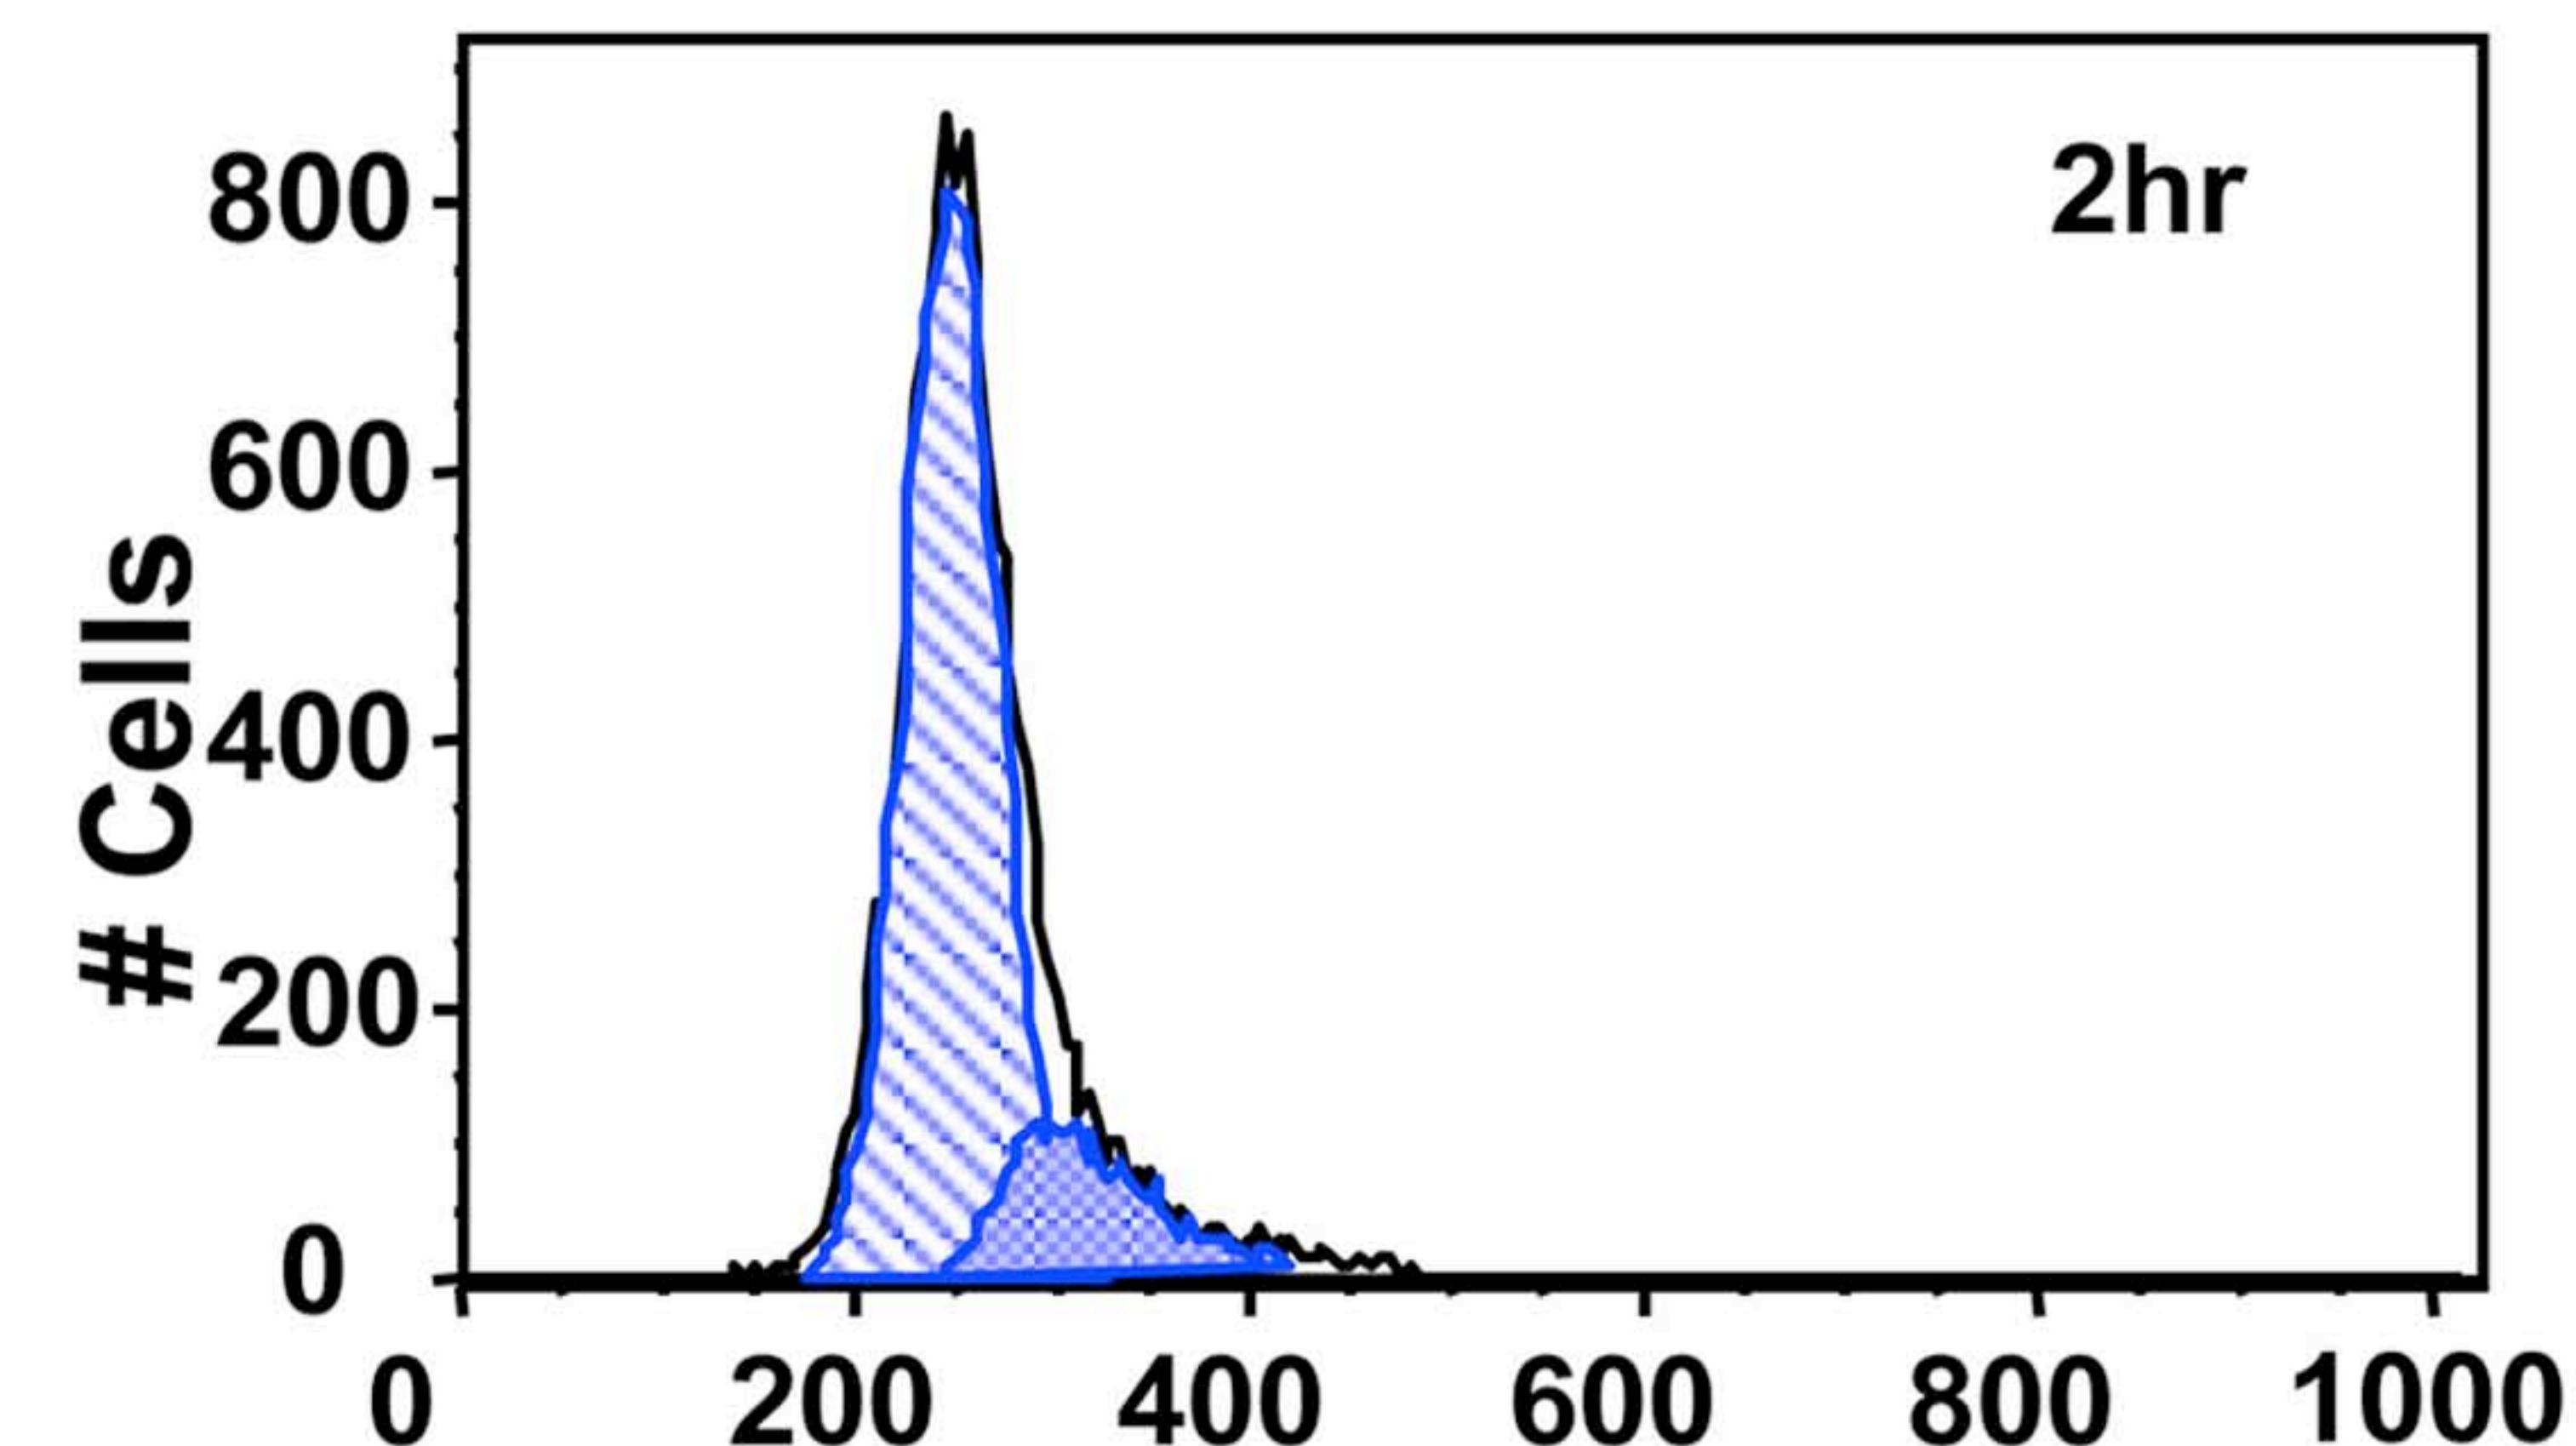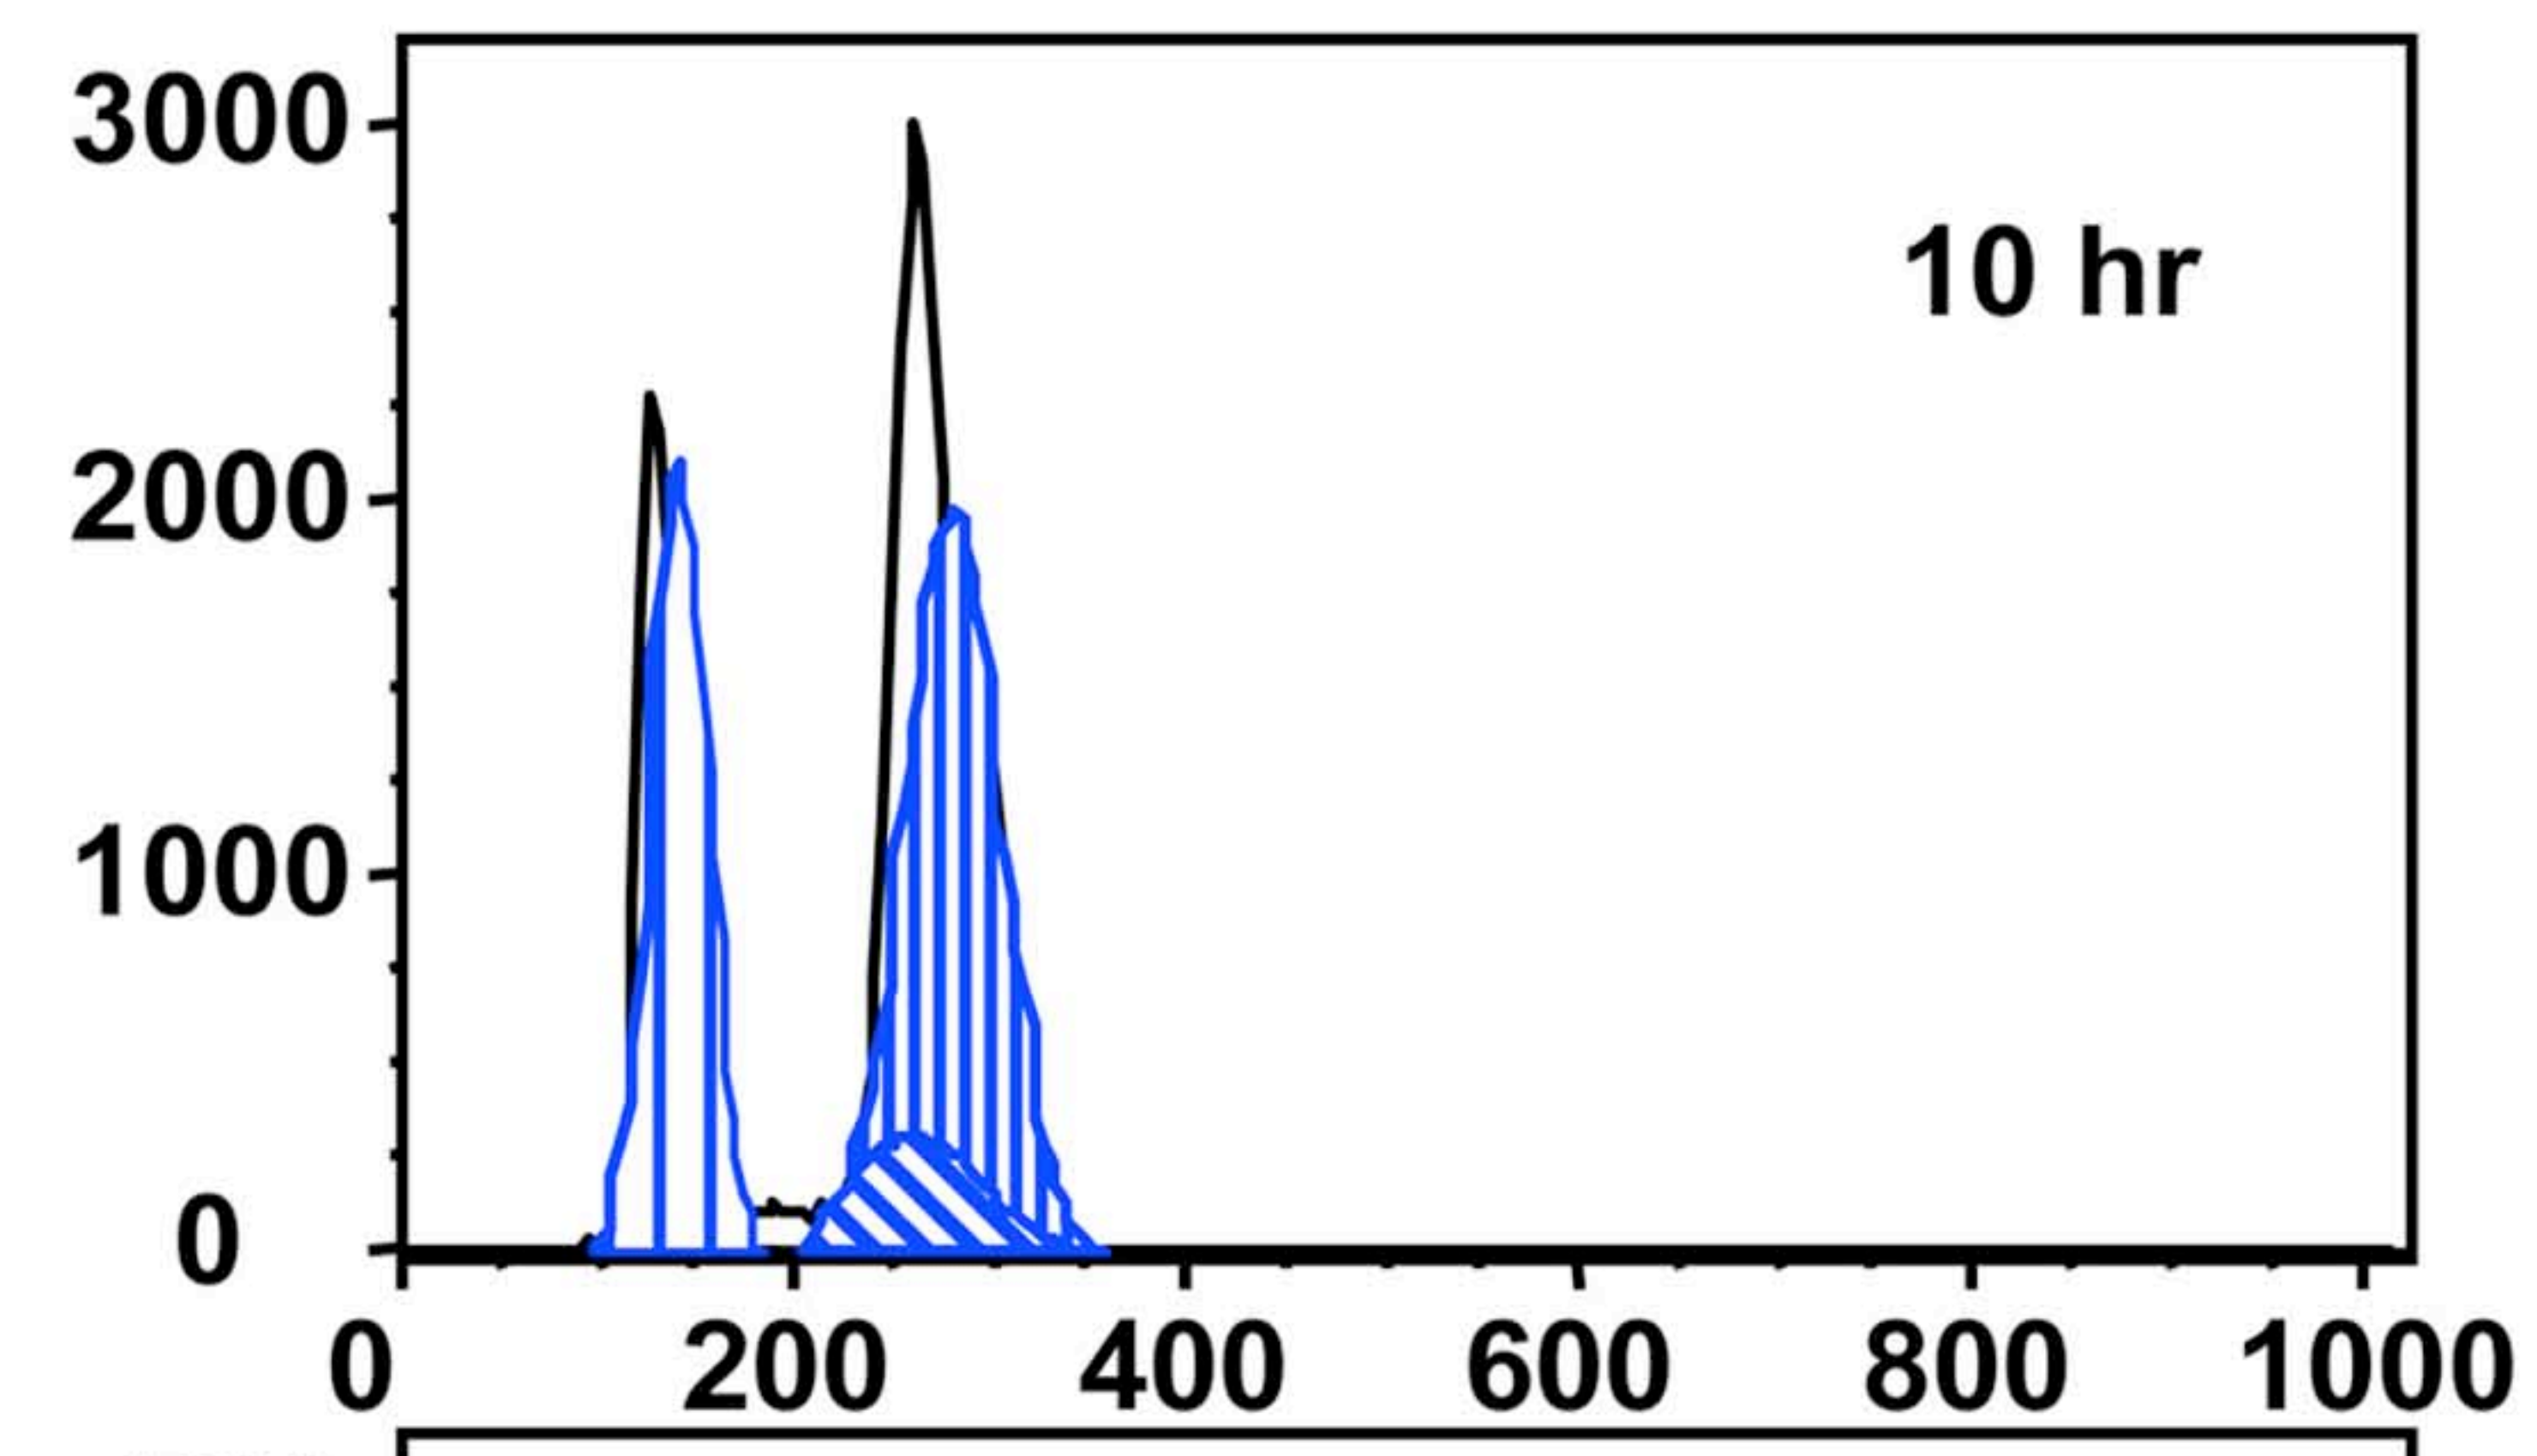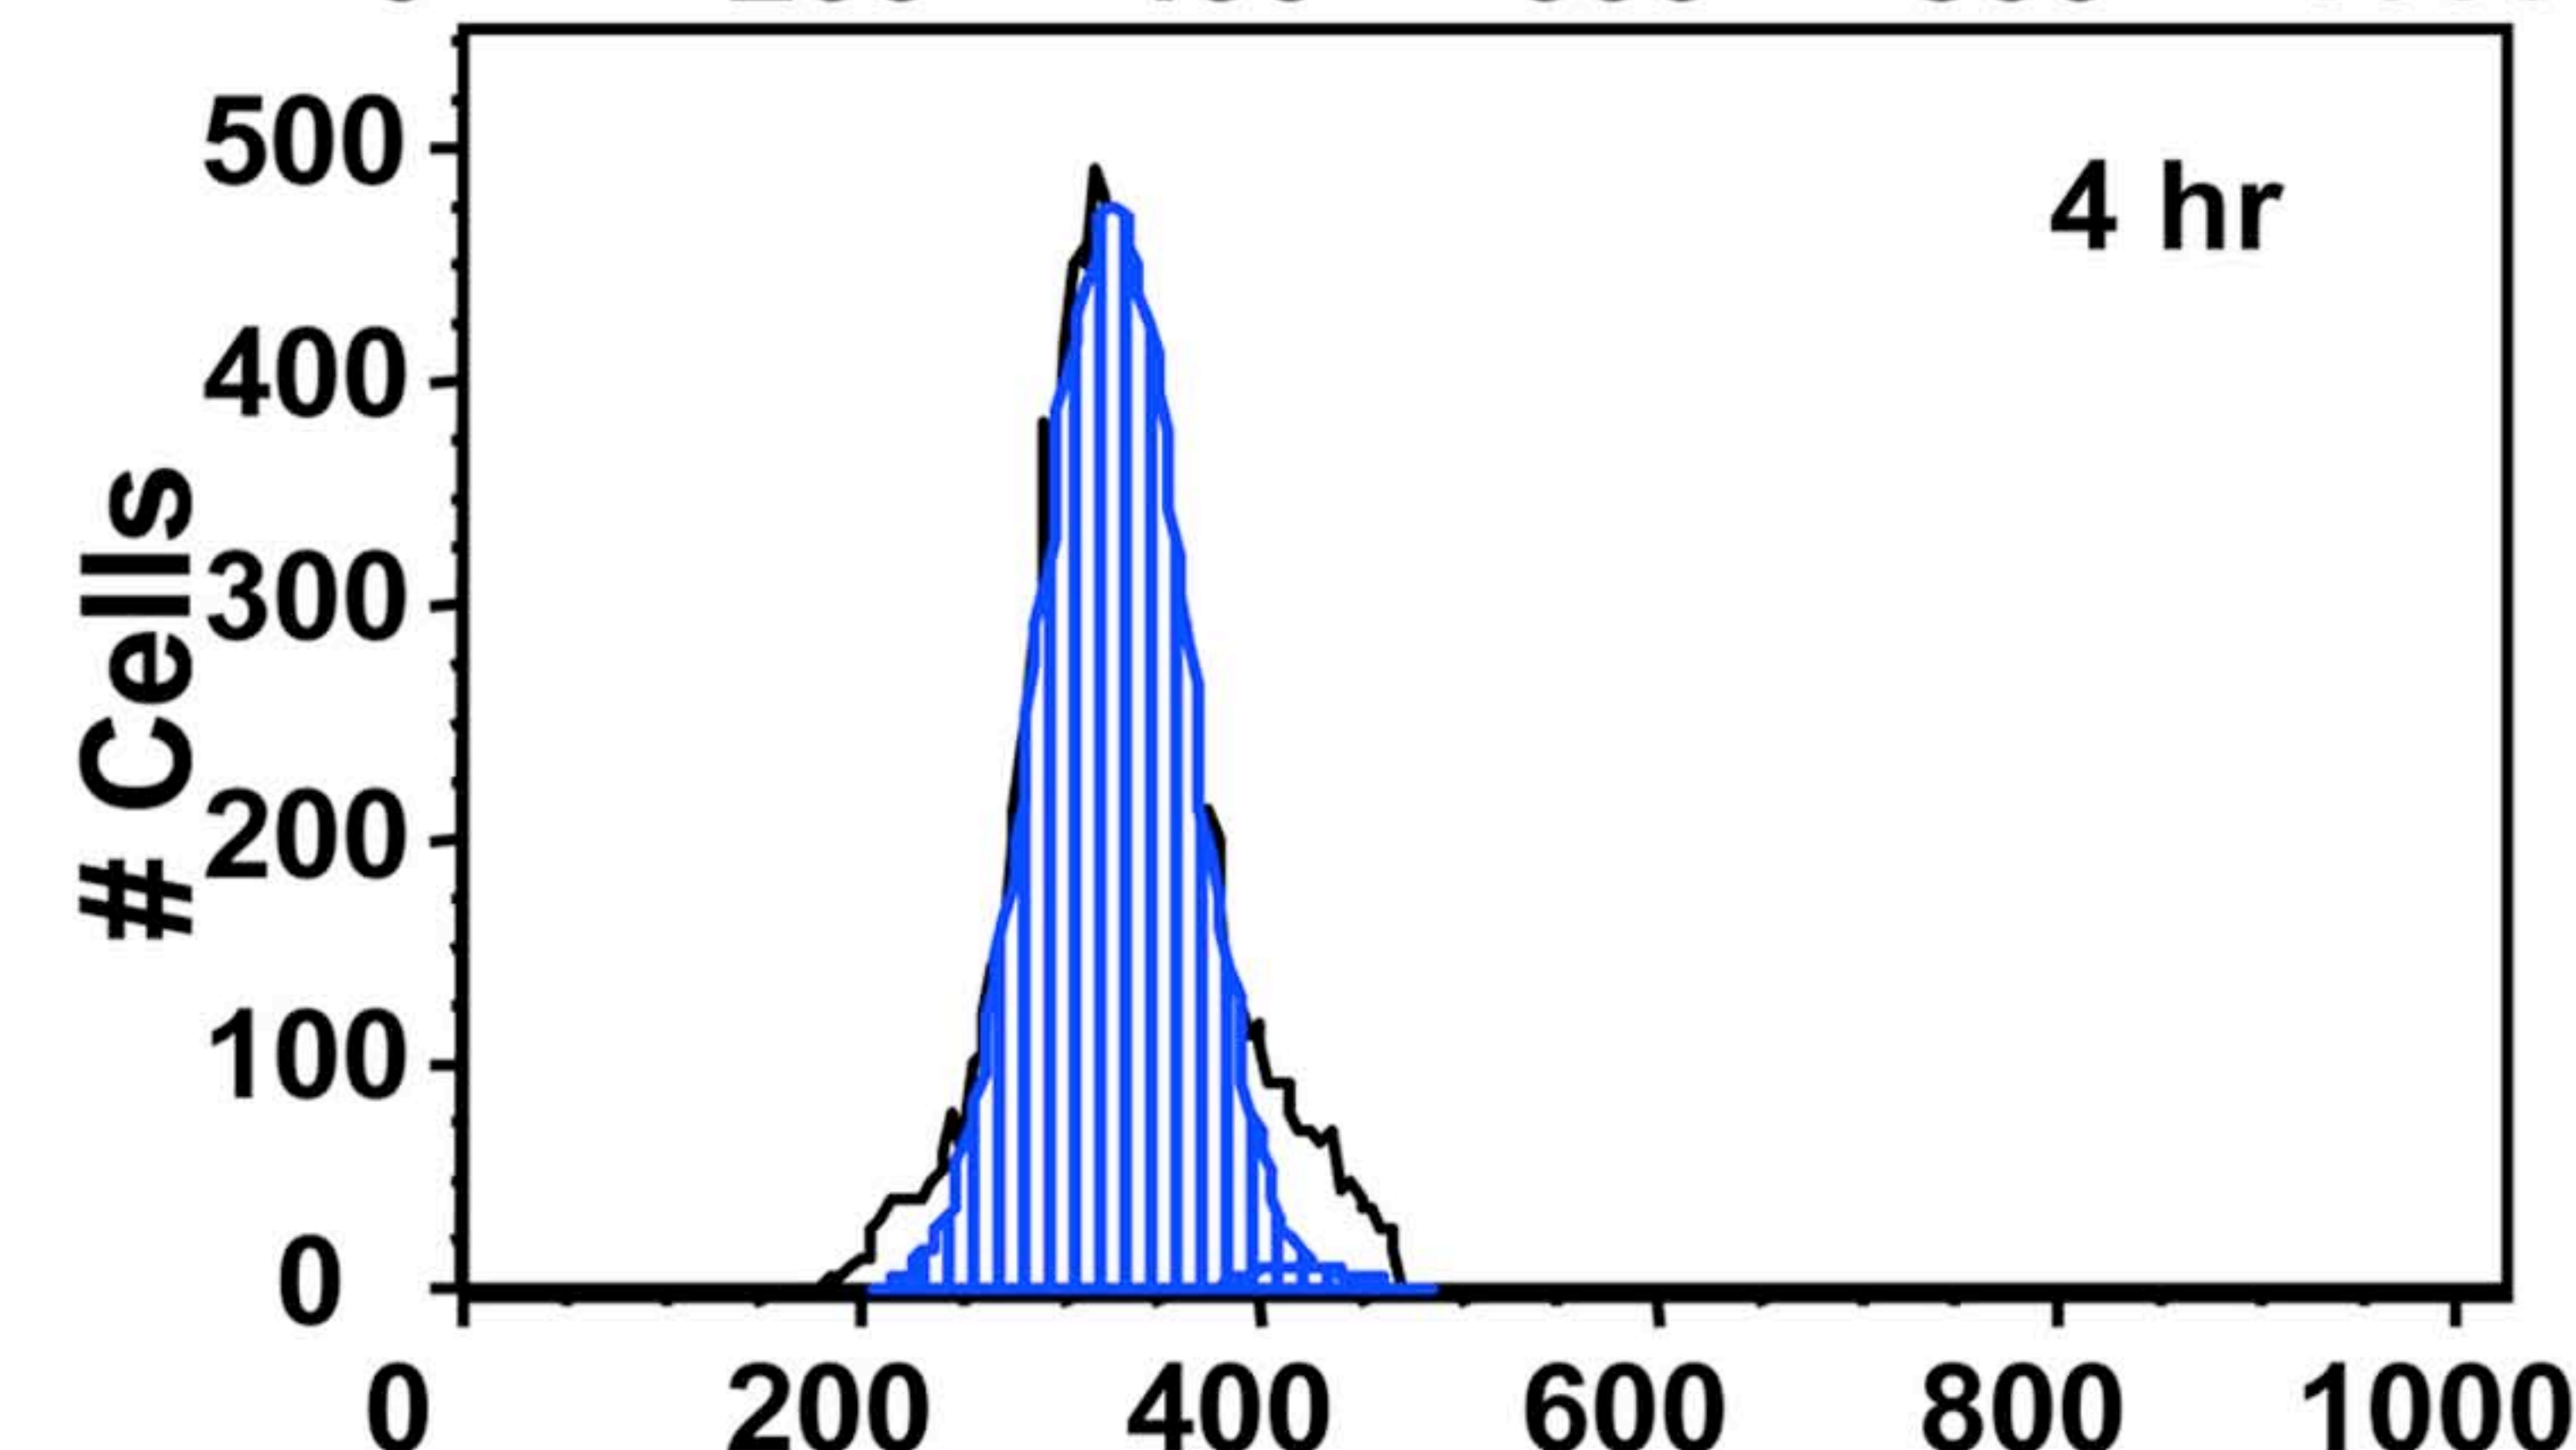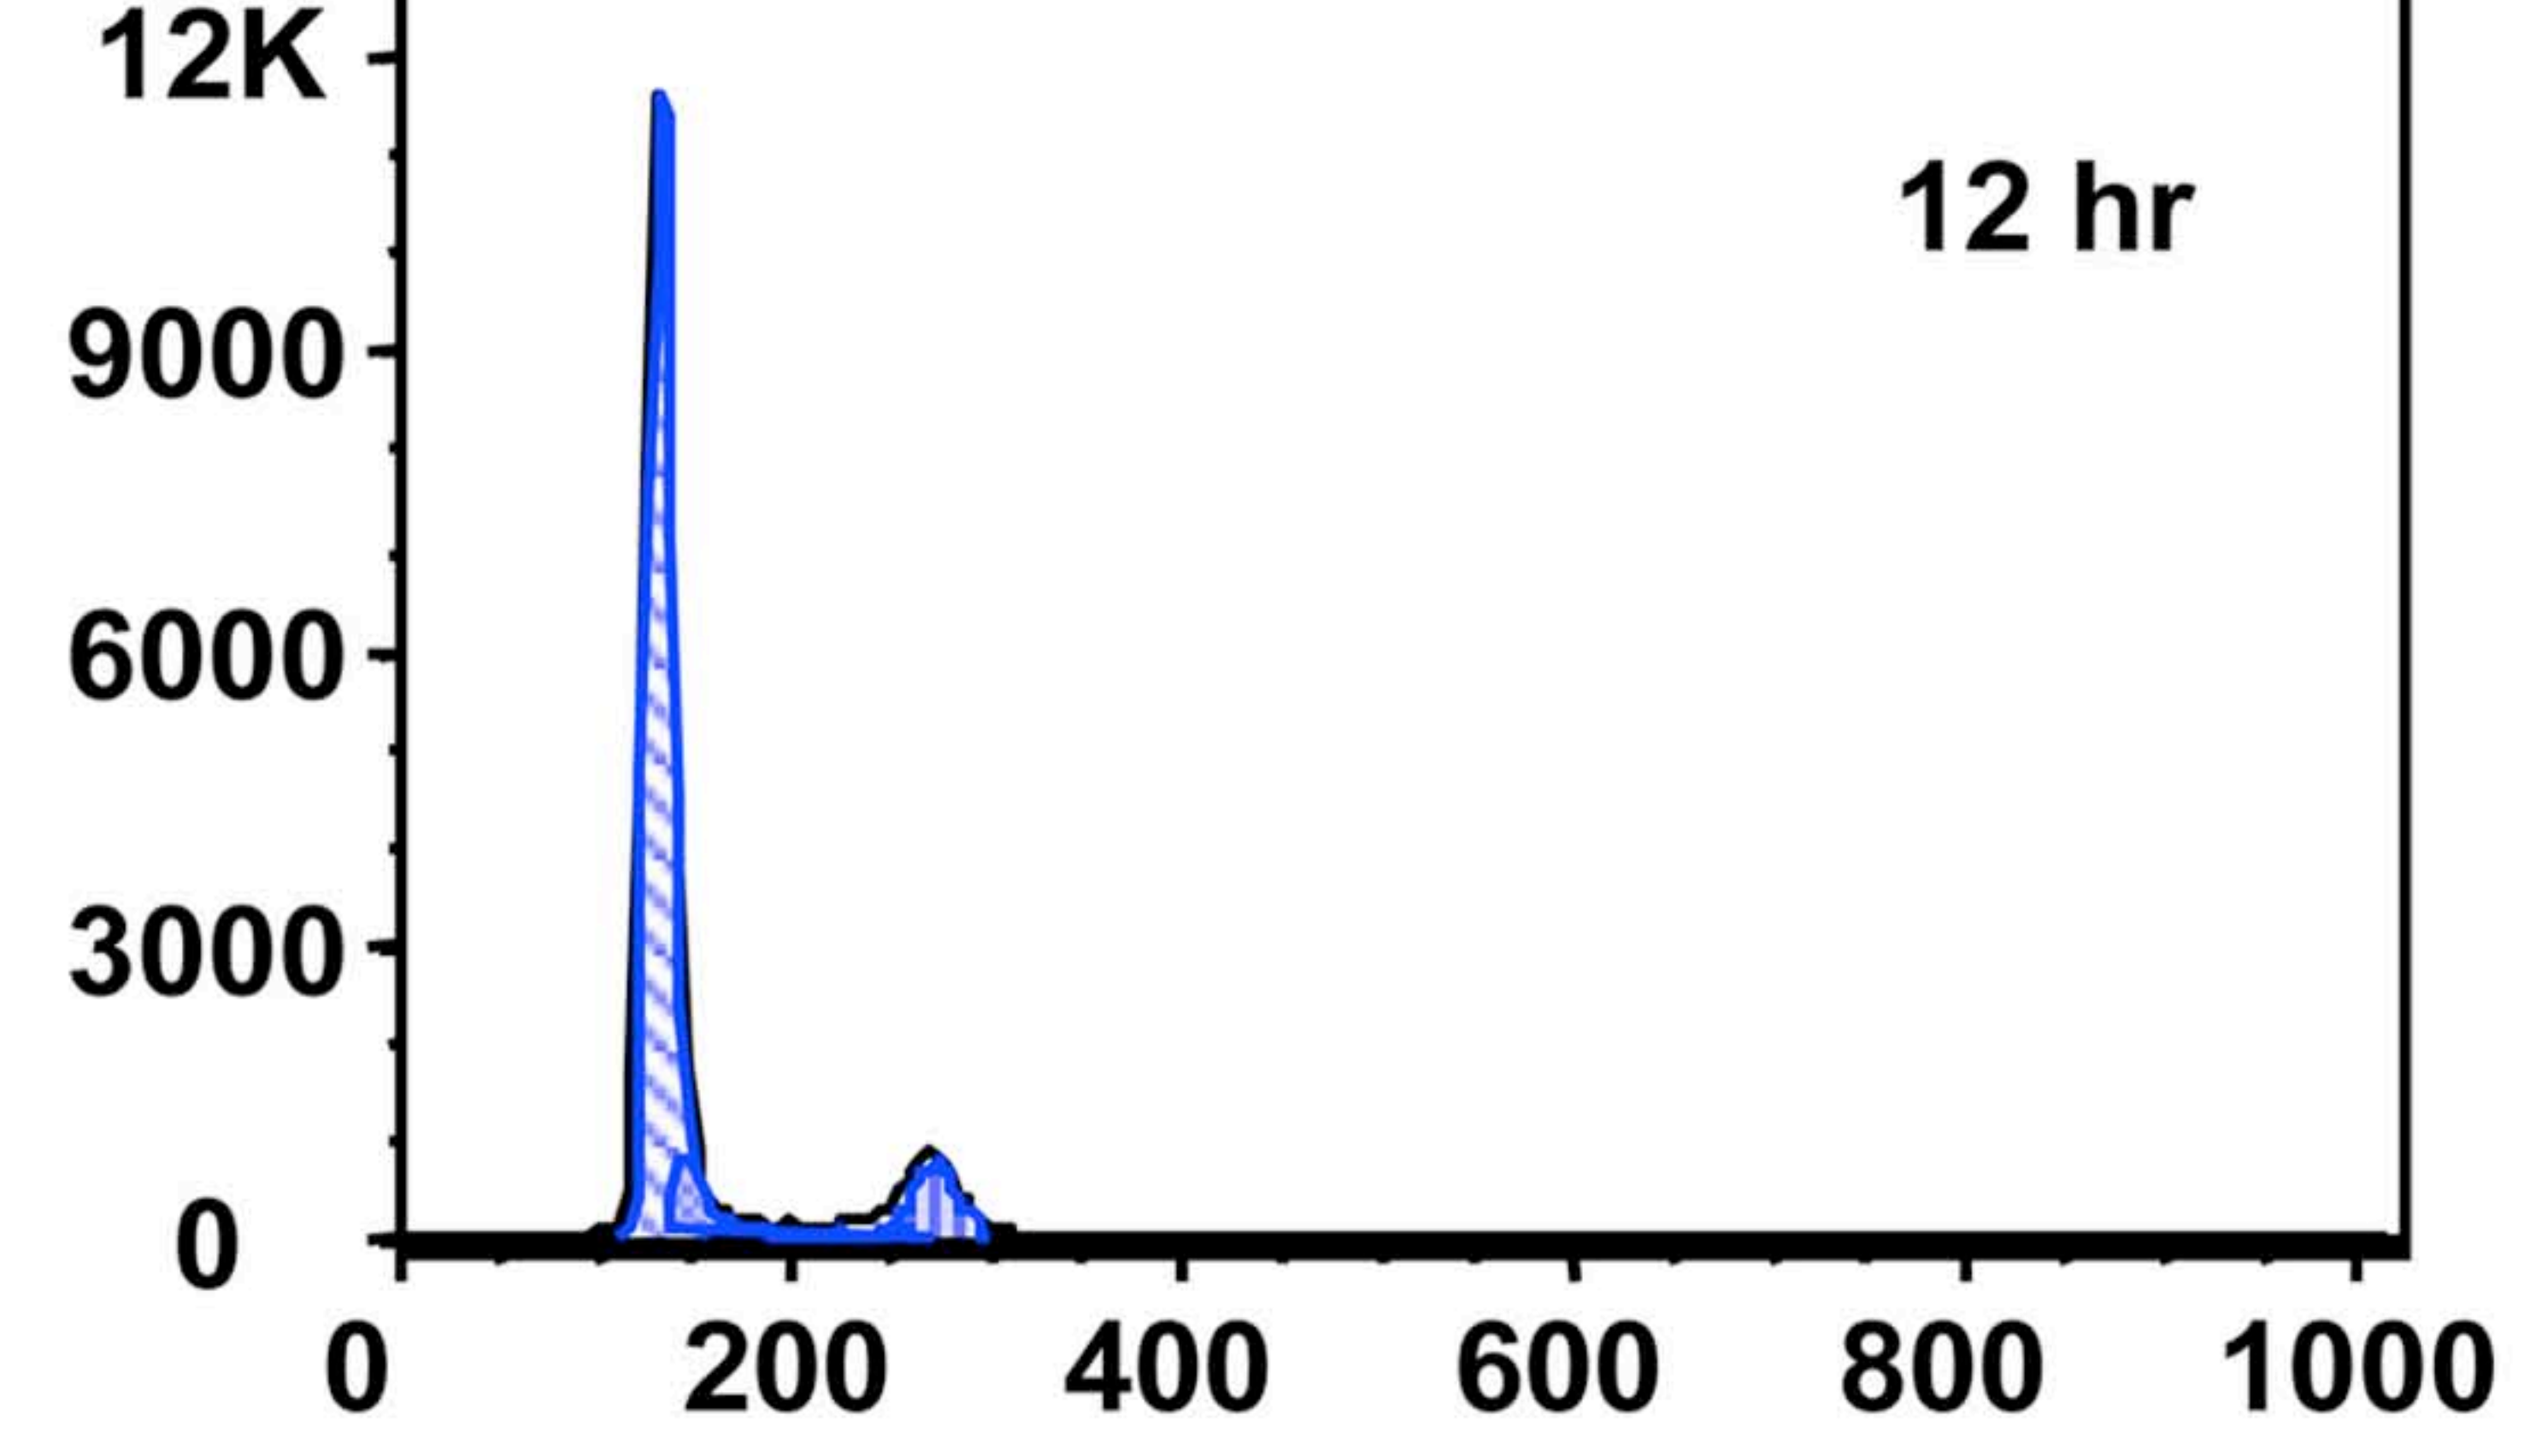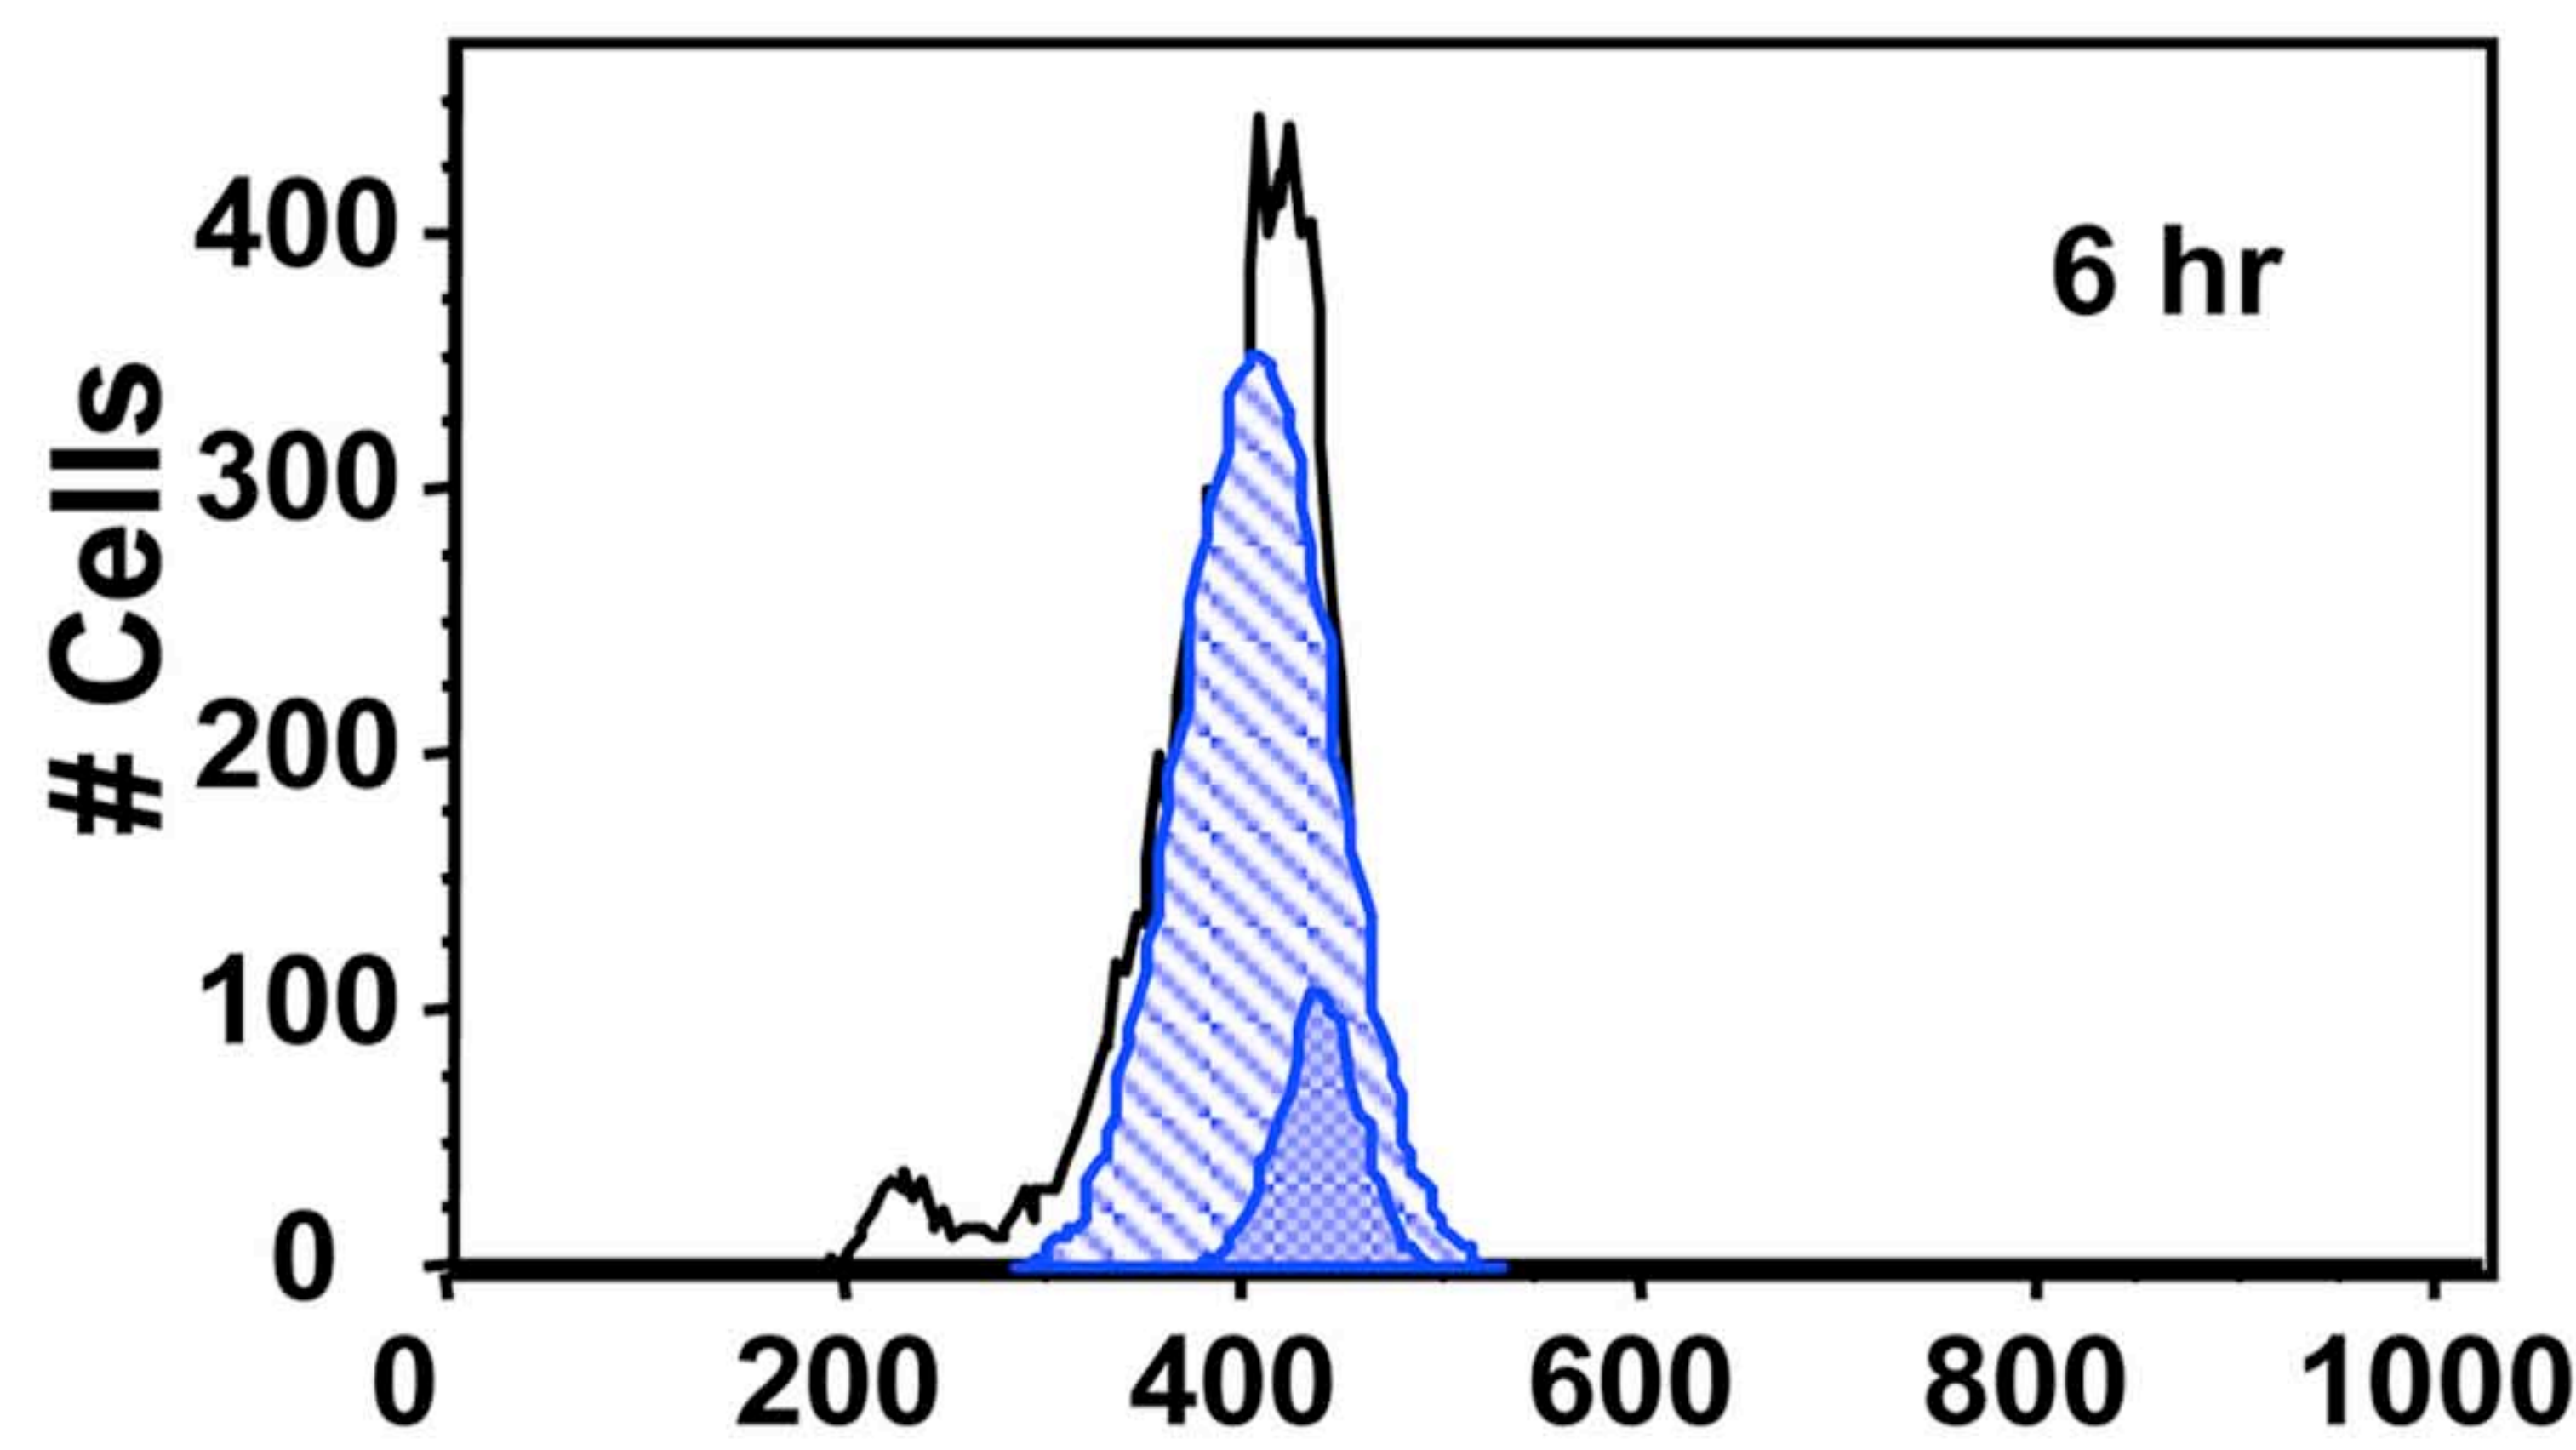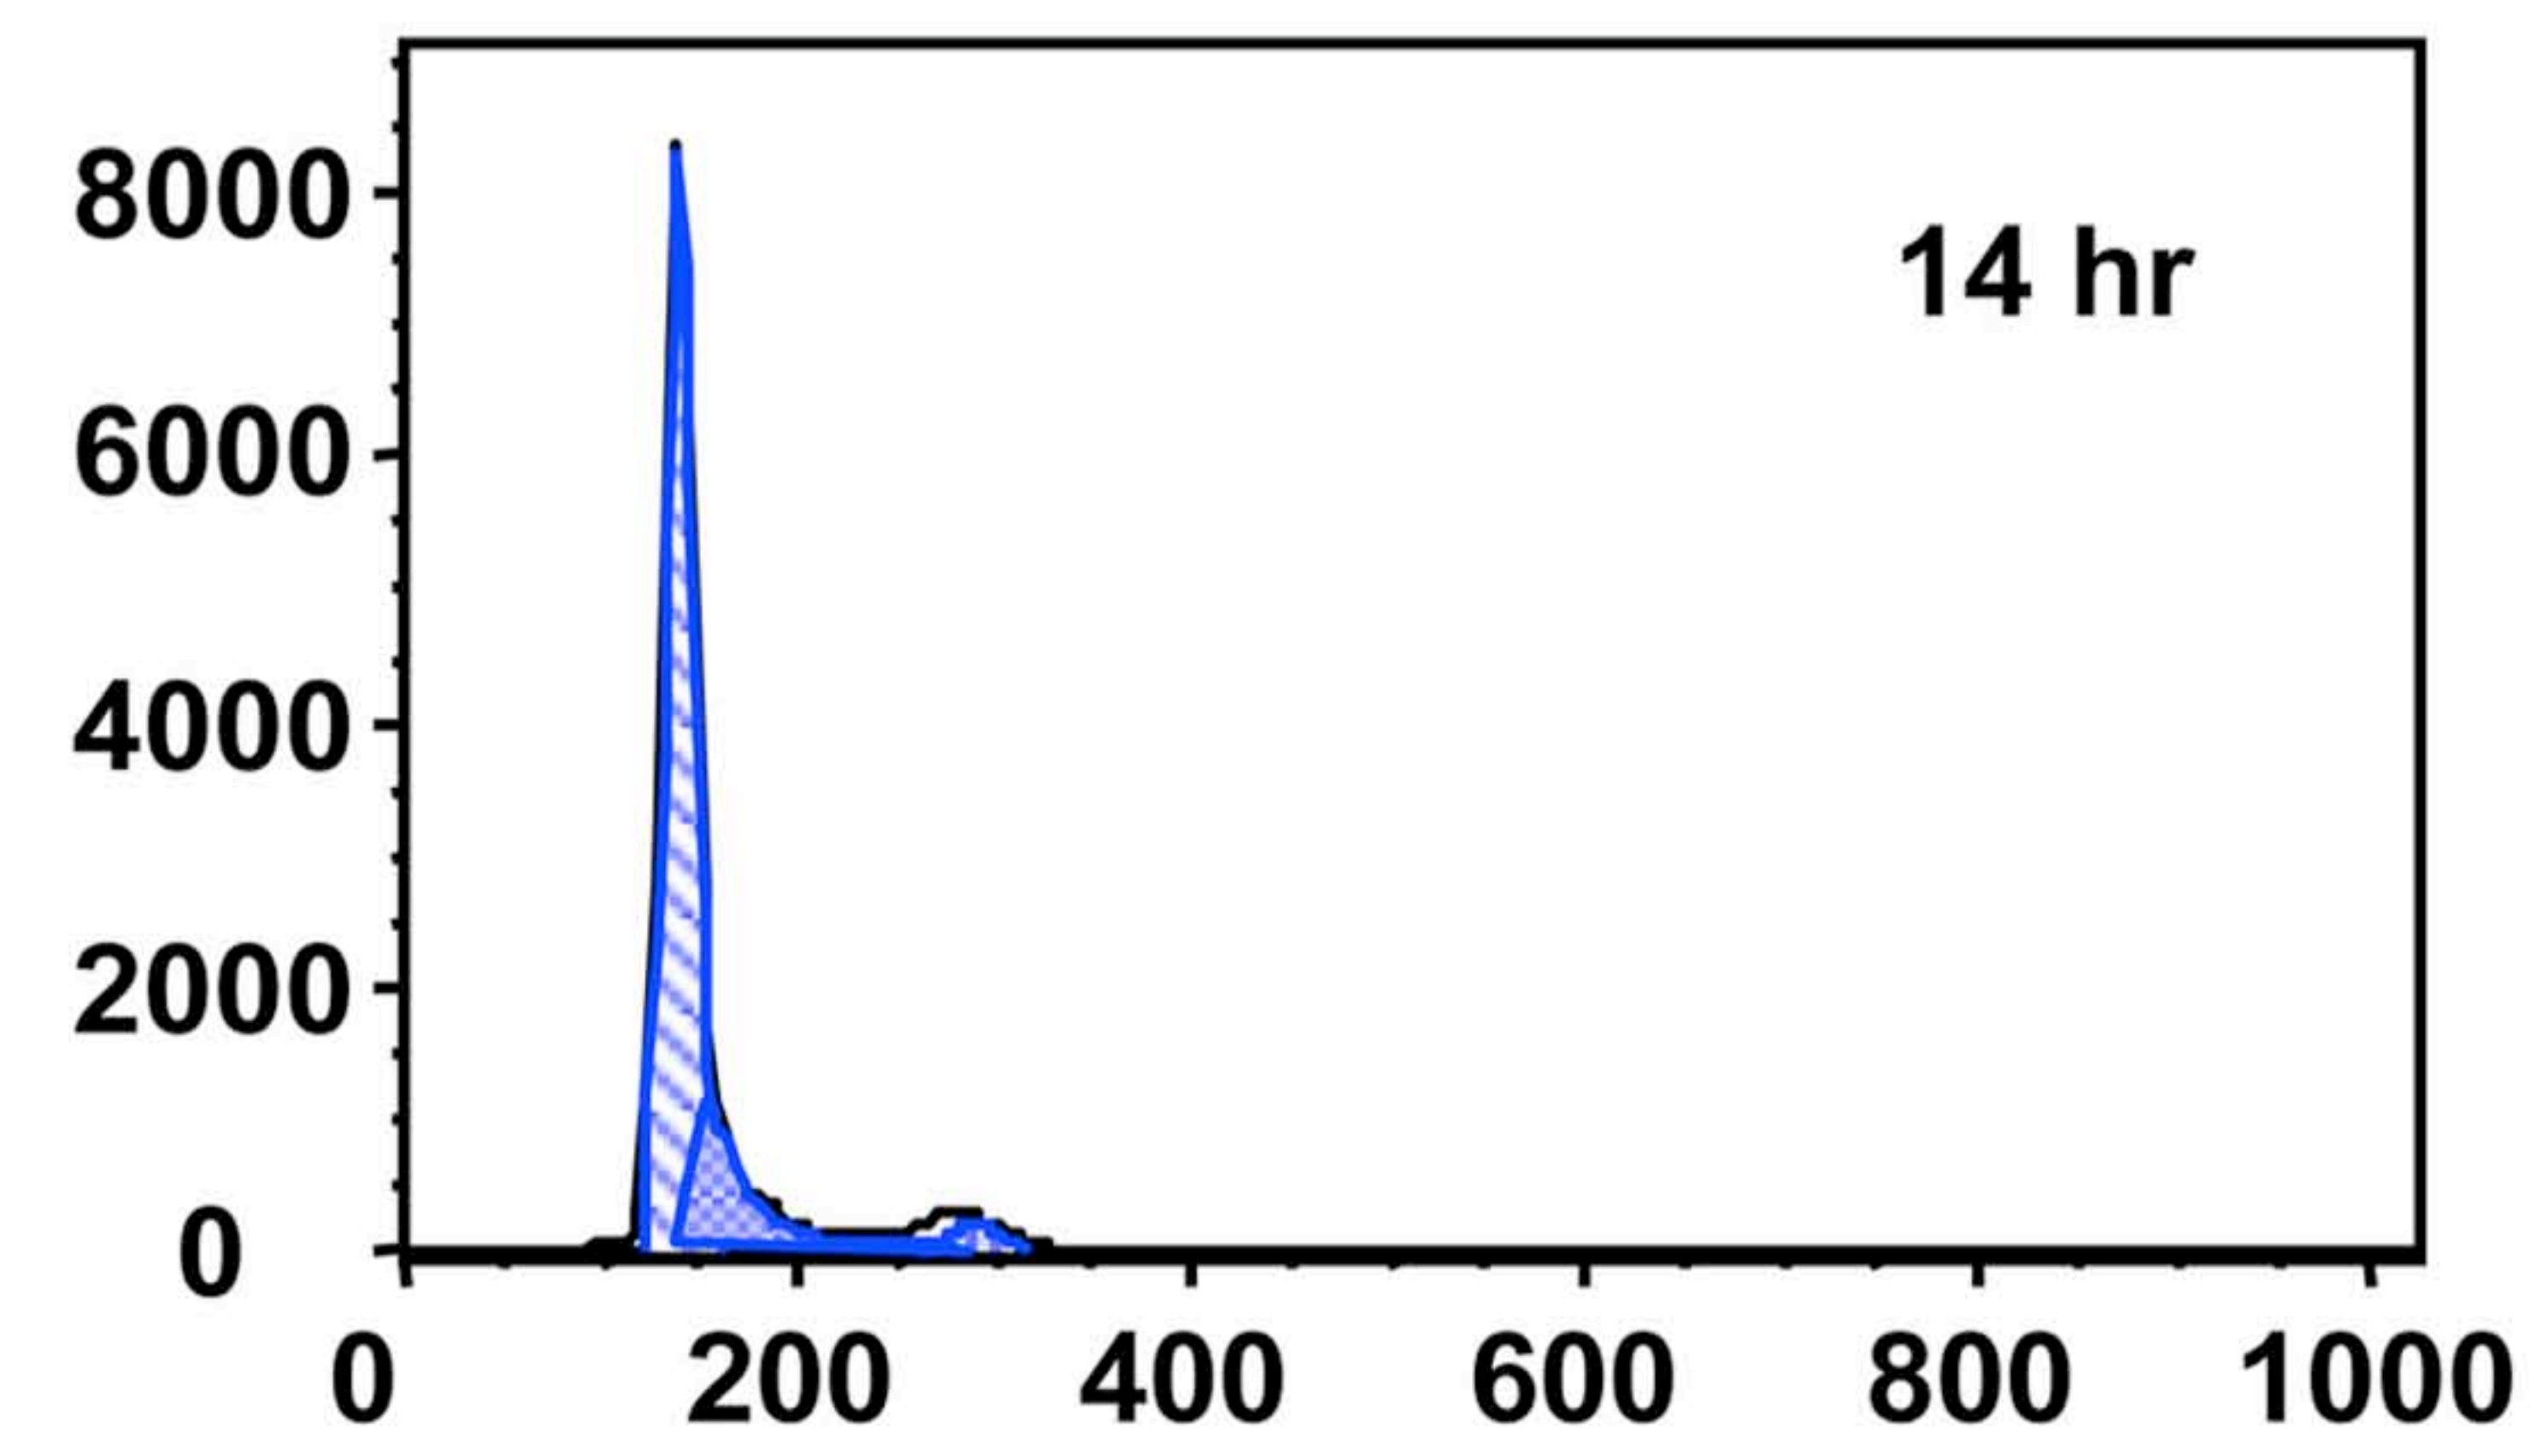

FL2-A: DNA-Area

| % cells in | G1   | S    | G2   |
|------------|------|------|------|
| 0 hr       | 78.2 | 19.3 | 0.0  |
| 2 hr       | 77.7 | 17.7 | 0.0  |
| 4 hr       | 92.5 | 0.91 | 0.0  |
| 6 hr       | 88.0 | 13.9 | 0.0  |
| 8 hr       | 4.2  | 9.4  | 85.3 |
| 10 hr      | 36.3 | 9.1  | 58.5 |
| 12 hr      | 74.3 | 12.7 | 10.6 |
| 14 hr      | 70.1 | 22.4 | 4.71 |



1 MPFAEDKTYKYICRNFSNFCNVDVVEILPYLPCLTARDQDRPRATCTLSG 50  
51 NRDTLWHLFNTLQRRPGWVEYFIAALRGCELVDLADEVASVYQSYQPRTS 100  
101 DRPPDPLEPPSLPAERPGPPTPAAAHSIPYNSCREKEPSYPMPVQETQAP 150  
151 ESPGENSEQALQTLSPRAIPRNPDGGPLESSSDLAALSPLTSSSGHQEQDT 200  
201 ELGSTHTAGATSSLTPSRGPVSPSVSFQPLAR**STP**RASRLPGPTGSVVST 250  
251 GTSFSSSSPGLASAGAAEGKQGAESDQAEPIICSSGAEAPANSLPSKVPT 300  
301 TLMPVNTVALKVPANPASVSTVPSKLPSTSSKPPGAVPSNALTNPAPSKLP 350  
351 INSTRVGMVPSKVPTSMVLTKVPASTVPTDGSSRNEETPAAPTTPAGATGG 400  
401 SSAWLDSSSENRRGLGSELSKPGVLASQVDSPFSGCFEDLAISASTSLGMG 450  
451 PCHGPEENEYKSEGTFGIH VAENPSIQLLEGNPAPPADPDGGPRPQADRK 500  
501 FQEREVPCHRPSPGALWLQVAVTGVLVVTLLVVLYRRRLH 540



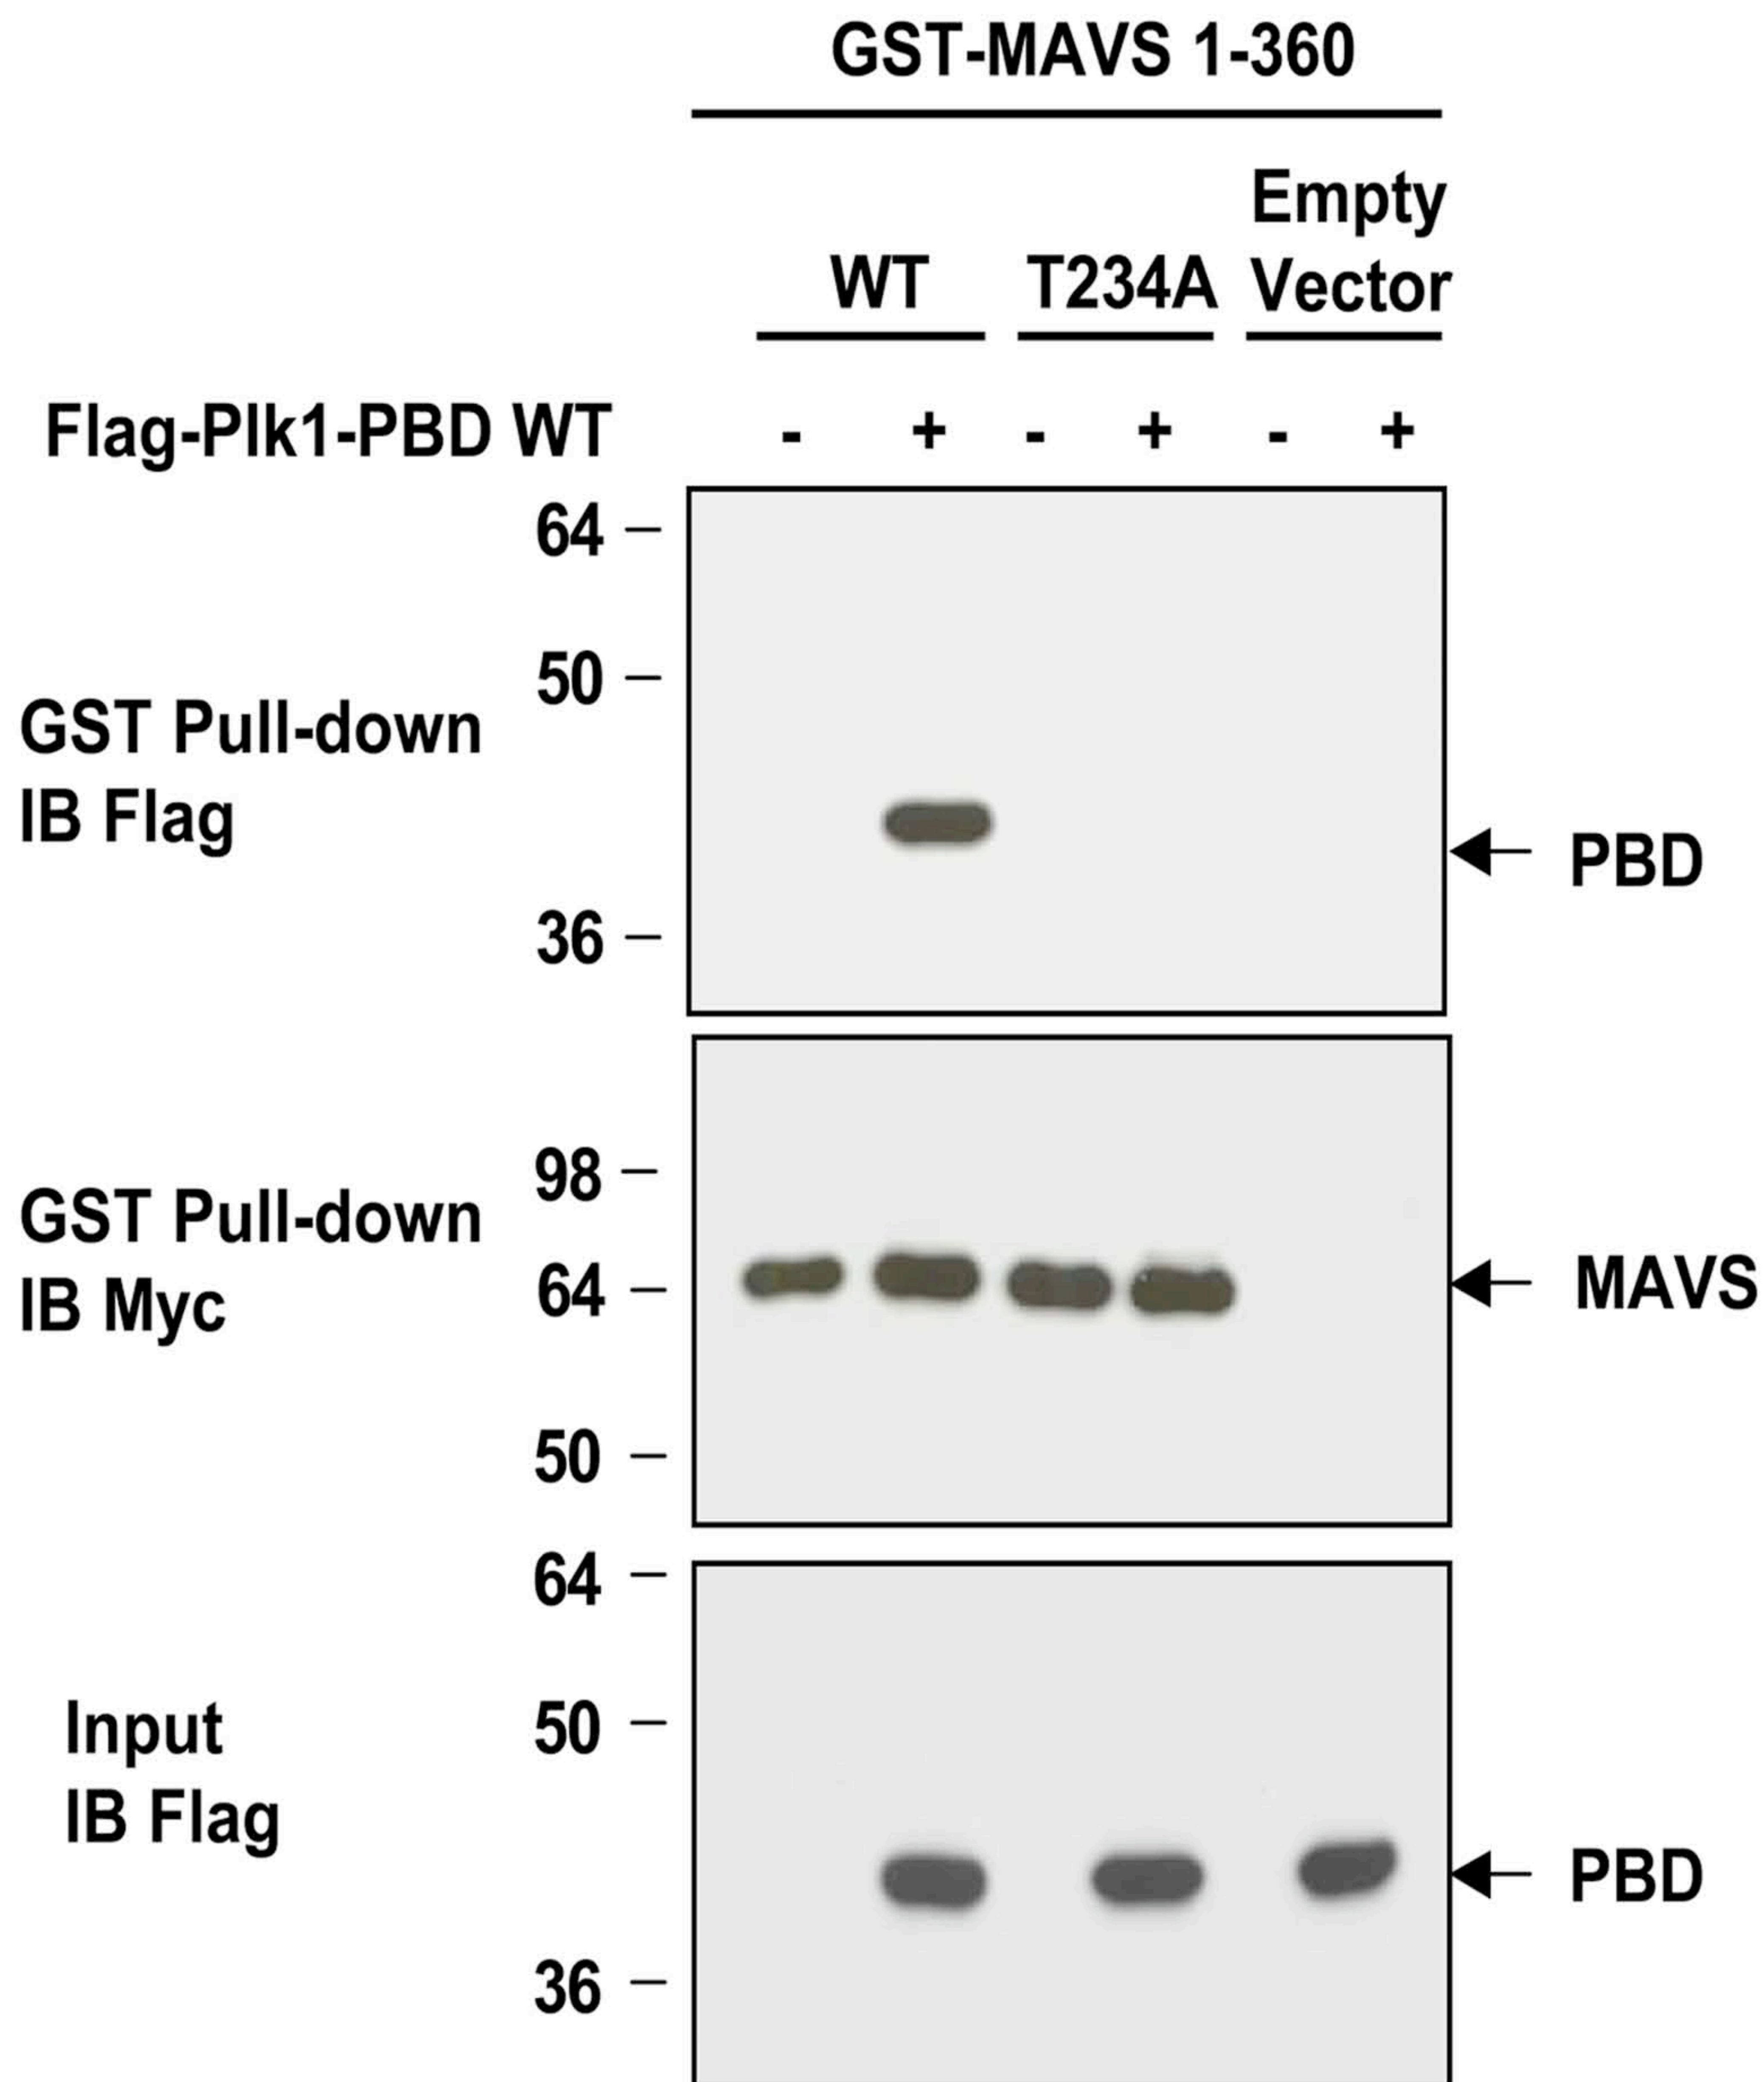

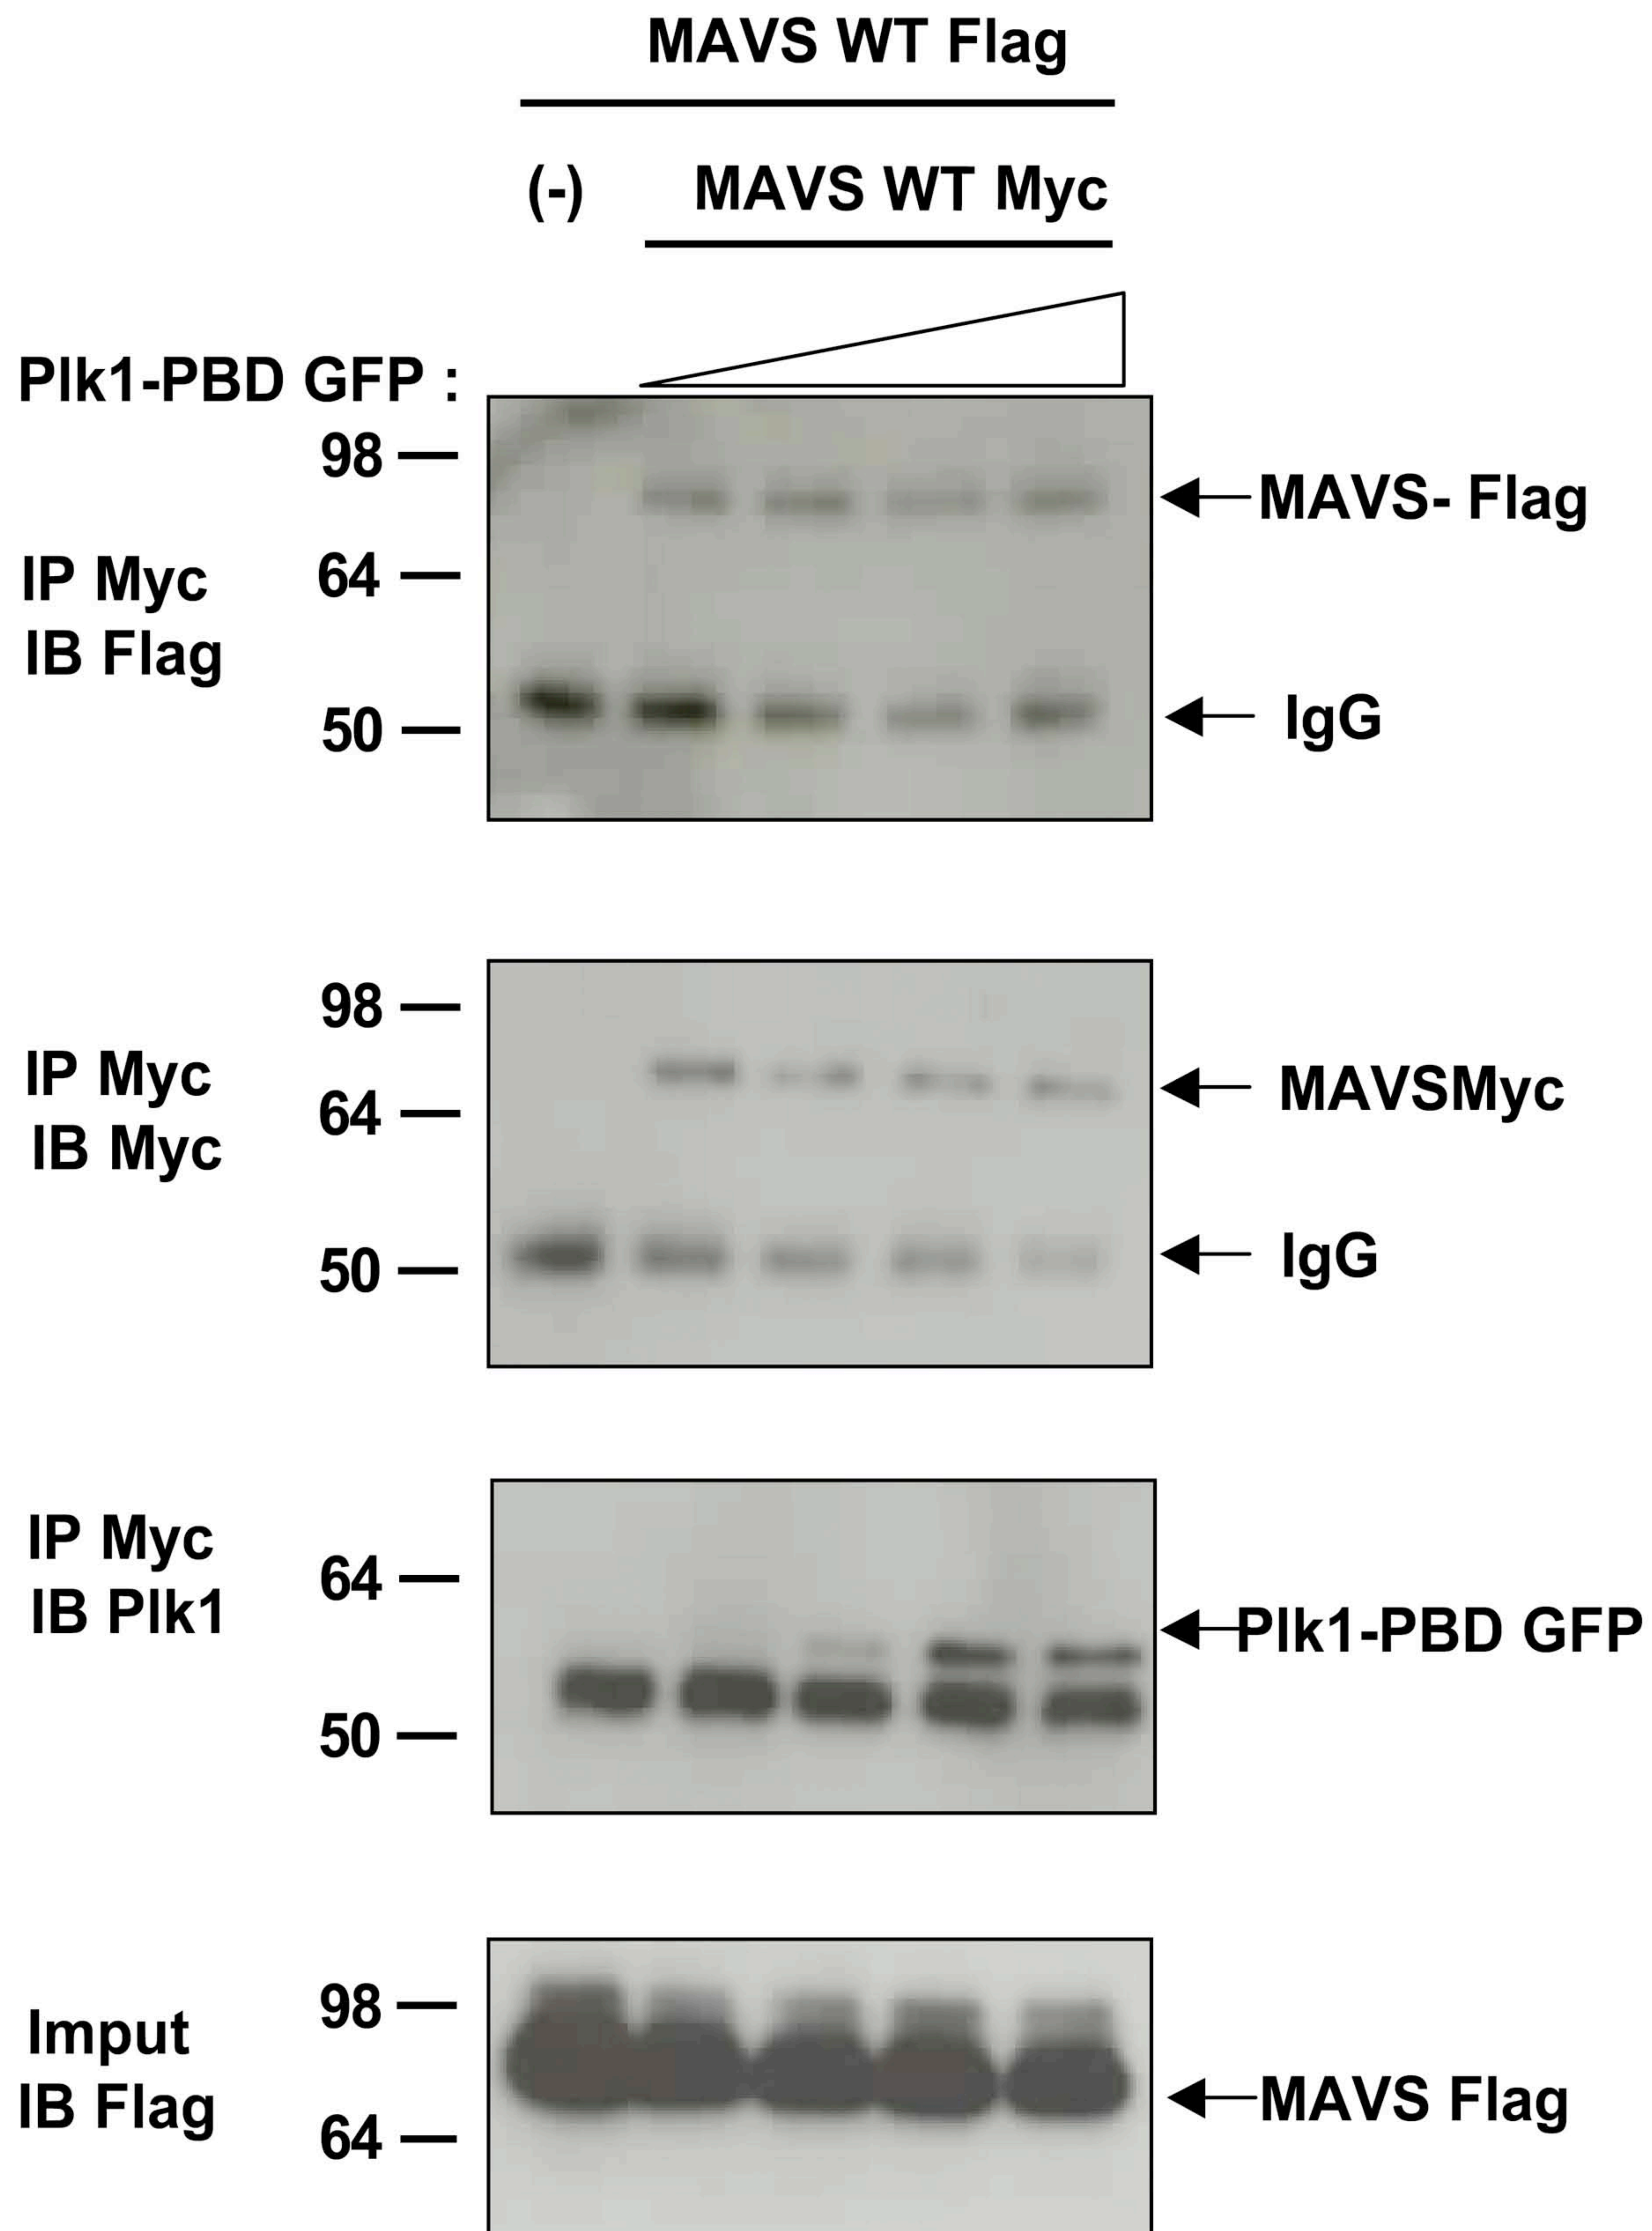



## SUPPLEMENTARY INFORMATION

Supplementary Fig 1. Respective expression of PLK1 and MAVS as function of the cell cycle.

Hela cells were synchronized by double thymidine block as described (58). The medium was removed and cells were washed three times in growth medium. At different times after thymidine release, cells were trypsinized and fixed in ethanol for FACS analysis to study DNA content, and protein extracts were prepared in RIPA buffer (10mM Tris-HCl pH 7.4, 150mM NaCl, 5mM EDTA, 0.1% SDS, 0.5% sodium deoxycholate, 1% NP-40) for immunoblot analysis of PLK1, MAVS and Hsp60 (as control of mitochondria expression). The percentage of cells in the different phases of cell cycle are listed in a table.

Supplementary Fig 2. MAVS amino acid sequence.

The domains 1-157 and 470-540 are represented in grey and correspond to regions that do not bind PLK1. In the 157-470 domain, the 180-280 sequence that specifically recruits the phosphopeptide binding site of PLK1 is framed, as well as the STP motif containing the T234 residue.

Supplementary Fig 3. Requirement of MAVS T234 for specific binding to PLK1-PBD.

HEK 293T cells were transfected with pFLAG-PLK1-PBD WT in the presence of pcDNA3.1(+) (Empty vector) or pDEST-GST-MAVS1-360, in which the sequence was either unmodified (WT) or carrying the mutation T234A. 24 hrs after transfection, the cells were lysed in buffer B minus glycerol and submitted to GST pull-down of the GST-MAVS constructs. The presence of PLK1-PBD and MAVS retained in the GST pull-down and expression of PLK1 in the total cell extracts was revealed by immunoblot using anti-FLAG and anti-MAVS antibodies.

Supplementary Fig 4. PLK1 does not affect MAVS dimerization

HEK 293T cells were transfected with pMyc-MAVS, pFLAG-MAVS and increasing amounts of pEGFP-PLK1-PBD. After 24 hr, Myc-MAVS was immunoprecipitated as in Fig5A. The presence of FLAG-MAVS (upper panel), Myc-MAVS and PLK1-PBD (middle panels) in the immunocomplexes was revealed by immunoblot using anti-FLAG, anti-c-Myc or anti-PLK1 antibodies. Expression of FLAG-MAVS was controlled in the total cell extracts using anti-FLAG antibody (lower panel).
